# Supplementary material for: Copper-catalyzed S-arylation of Furanose-Fused Oxazolidine-2-thiones
Source: MDPI journal article supplement (doi:10.3390/molecules27175597), 2022-08-30
Supplement: s1 [file s1]

**Copper-catalyzed S-arylation of carbohydrate-fused  
oxazolidine-2-thiones**

Vilija Kederienė <sup>1,\*</sup>, Jolanta Rousseau <sup>2</sup>, Marie Schuler <sup>3</sup>, Algirdas Šačkus <sup>1</sup> and  
Arnaud Tatibouët <sup>3,\*</sup>

<sup>1</sup> Department of Organic Chemistry, Kaunas  
University of Technology, Radvilėnų pl. 19,  
LT-50254 Kaunas, Lithuania

<sup>2</sup> Univ. Artois, CNRS, Centrale Lille, Univ.  
Lille, UMR 8181 – UCCS – Unité de Catalyse  
et Chimie du Solide, F-62300 Lens, France

<sup>3</sup> Université d'Orléans et CNRS, ICOA, UMR  
7311, BP 6759, F-45067 Orléans France

\* Corresponding authors

E-mail address: vilija.kederiene@ktu.lt (V. Kederienė); arnaud.tatibouet@univ-orleans.fr (A. Tatibouët)

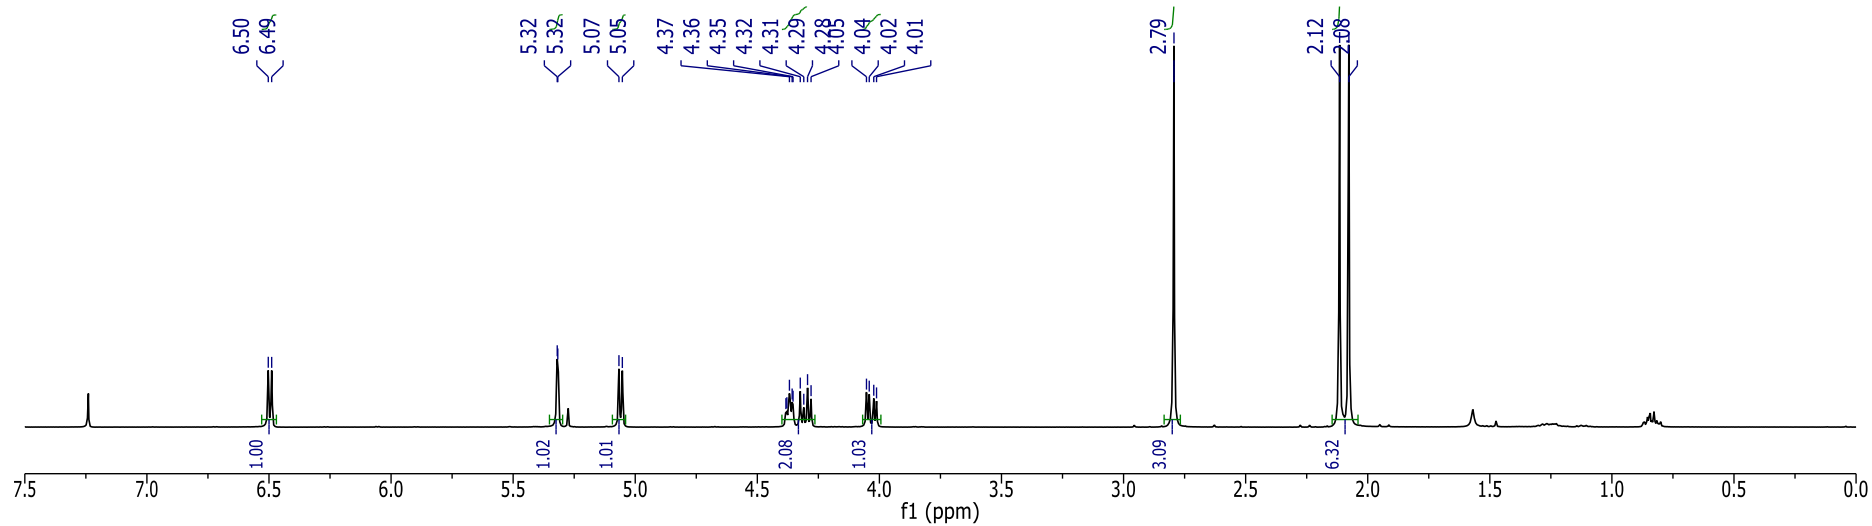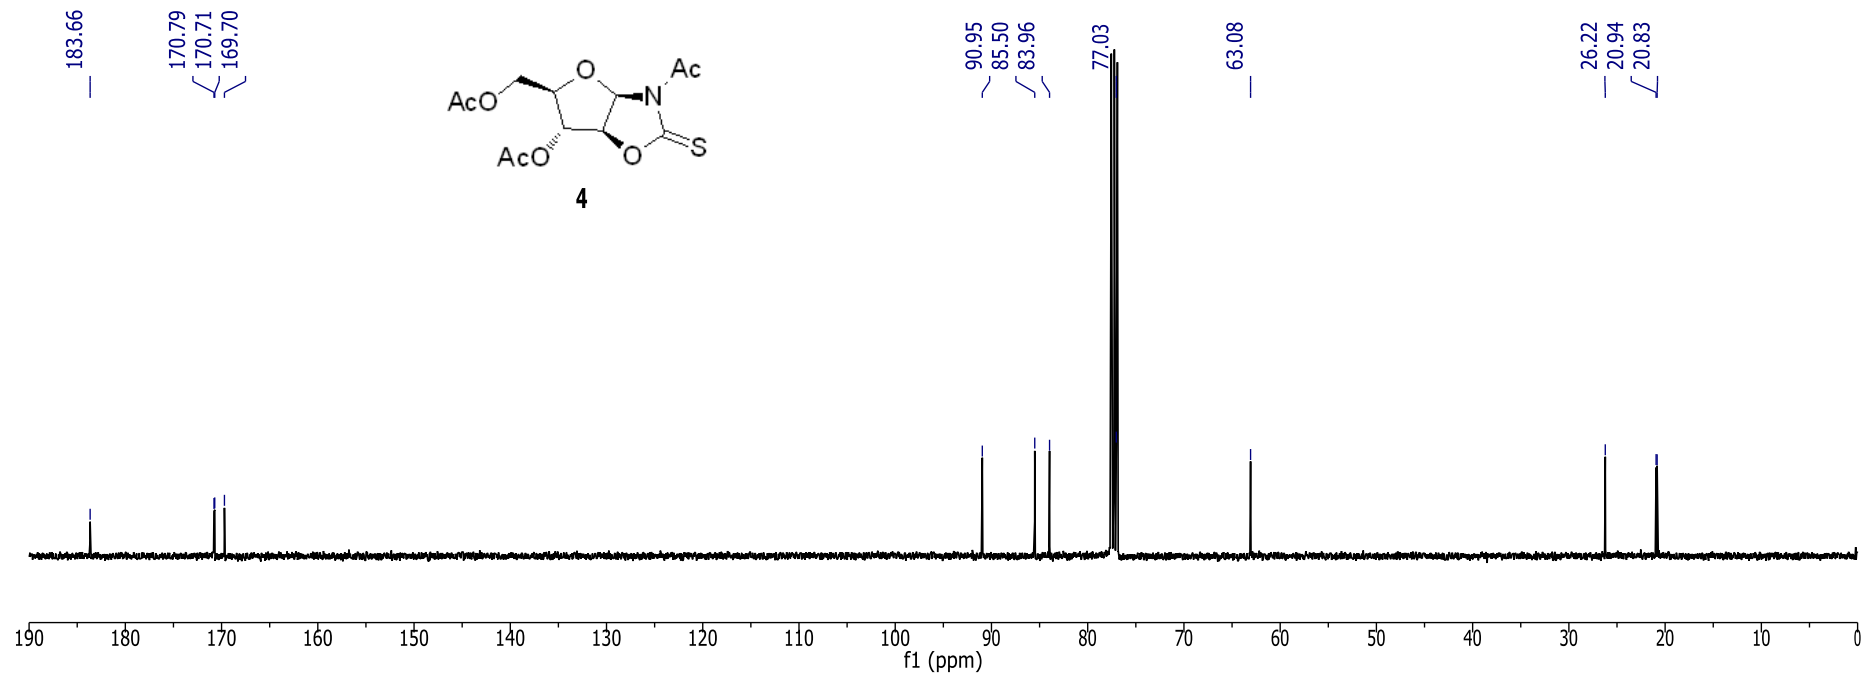

**Figure S1.** *N*-acetyl-4,5-dihydro(3',5'-di-*O*-acetyl-1',2'-dideoxy- $\beta$ -*D*-arabinofuranoso)-[1,2-*d*]-oxazolidine-2-thione (4).  $^1\text{H}$  NMR (400 MHz,  $\text{CDCl}_3$ ) and  $^{13}\text{C}$  NMR (100 MHz,  $\text{CDCl}_3$ ) spectrums.

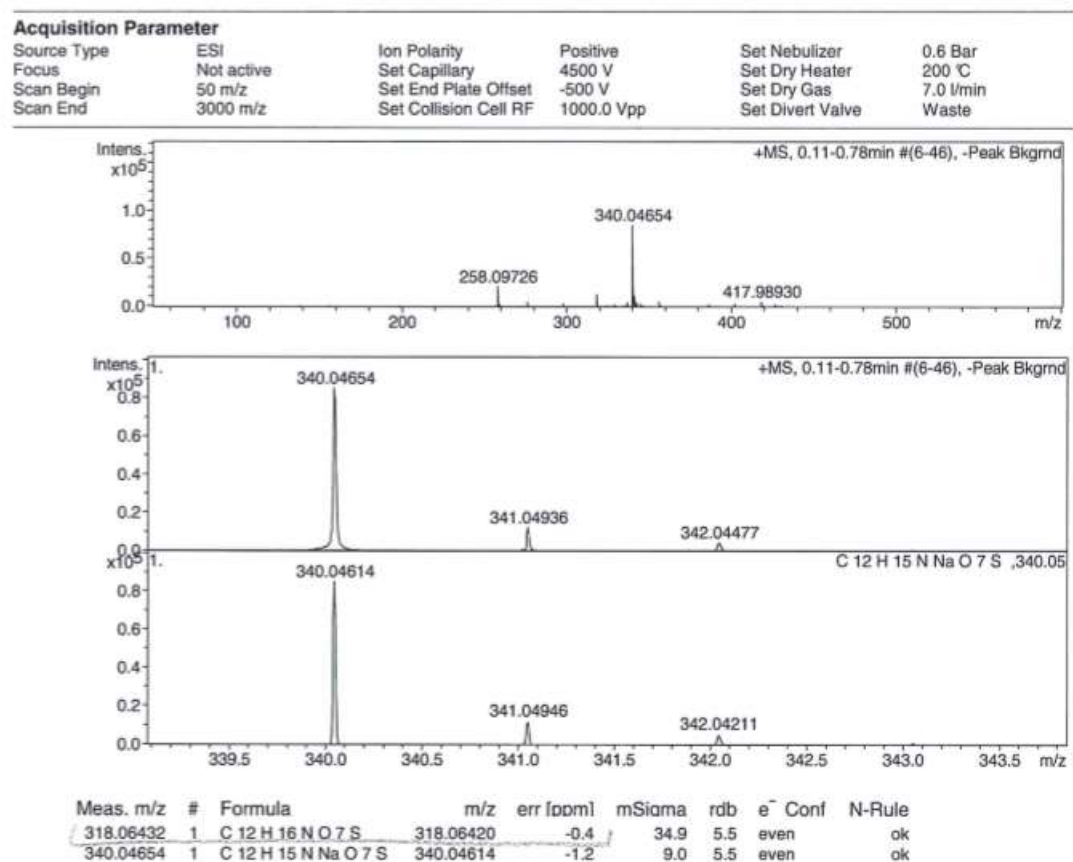

**Figure S2.** *N*-acetyl-4,5-dihydro(3',5'-di-*O*-acetyl-1',2'-dideoxy- $\beta$ -*D*-arabinofuranoso)-[1,2-*d*]-oxazolidine-2-thione (4). HRMS (ESI).

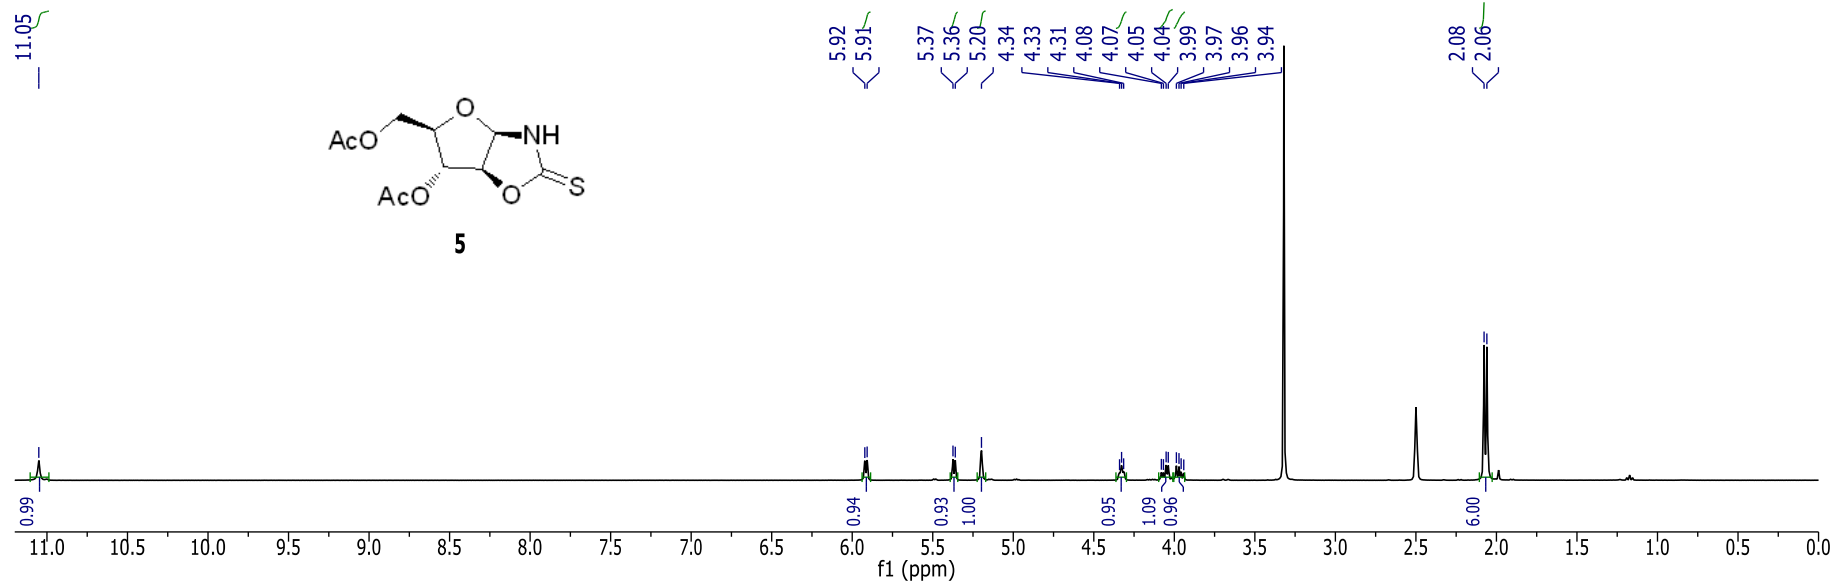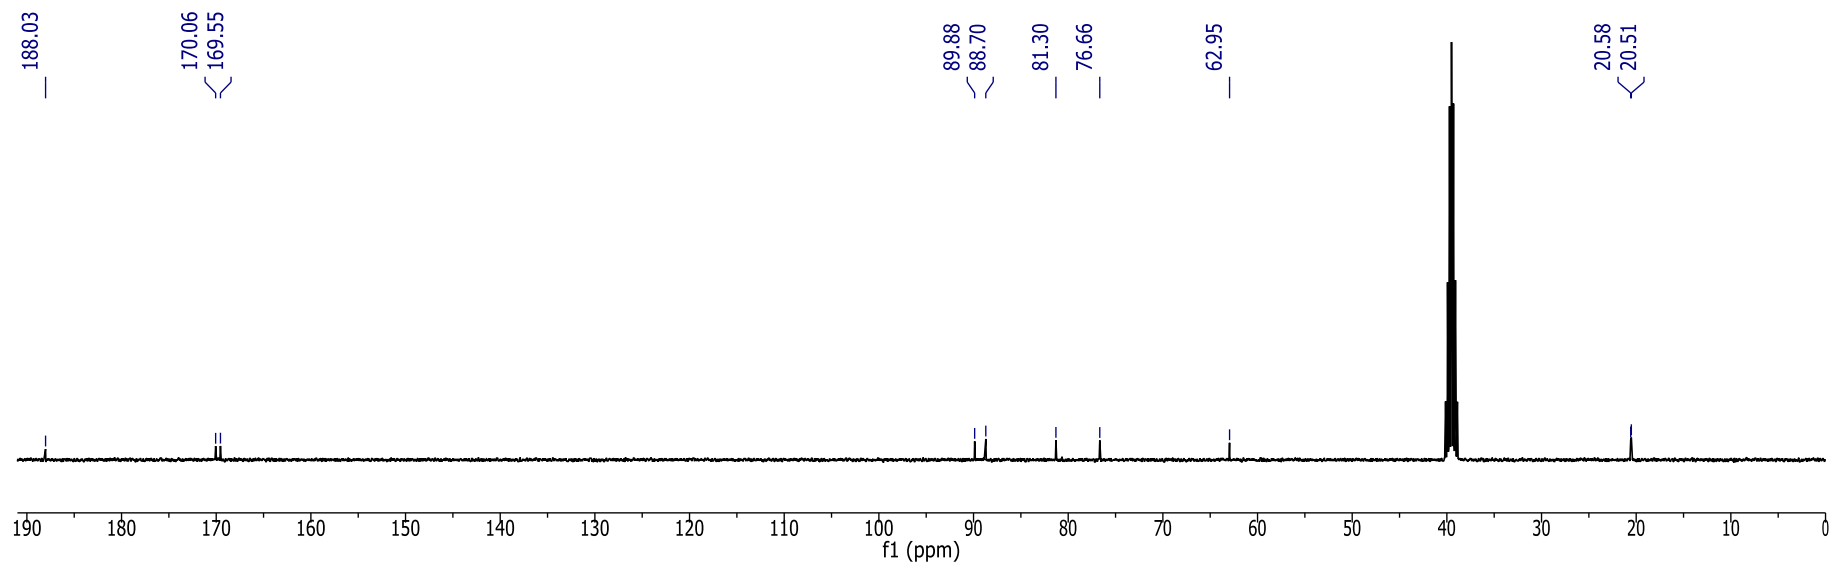

Figure S3. 4,5-Dihydro(3',5'-di-*O*-acetyl-1',2'-dideoxy- $\beta$ -*D*-arabinofuranoso)-[1,2-*d*]-oxazolidine-2-thione (5).  $^1\text{H}$  NMR (400 MHz,  $\text{DMSO-}d_6$ ) and  $^{13}\text{C}$  NMR (100 MHz,  $\text{DMSO-}d_6$ ) spectrums.

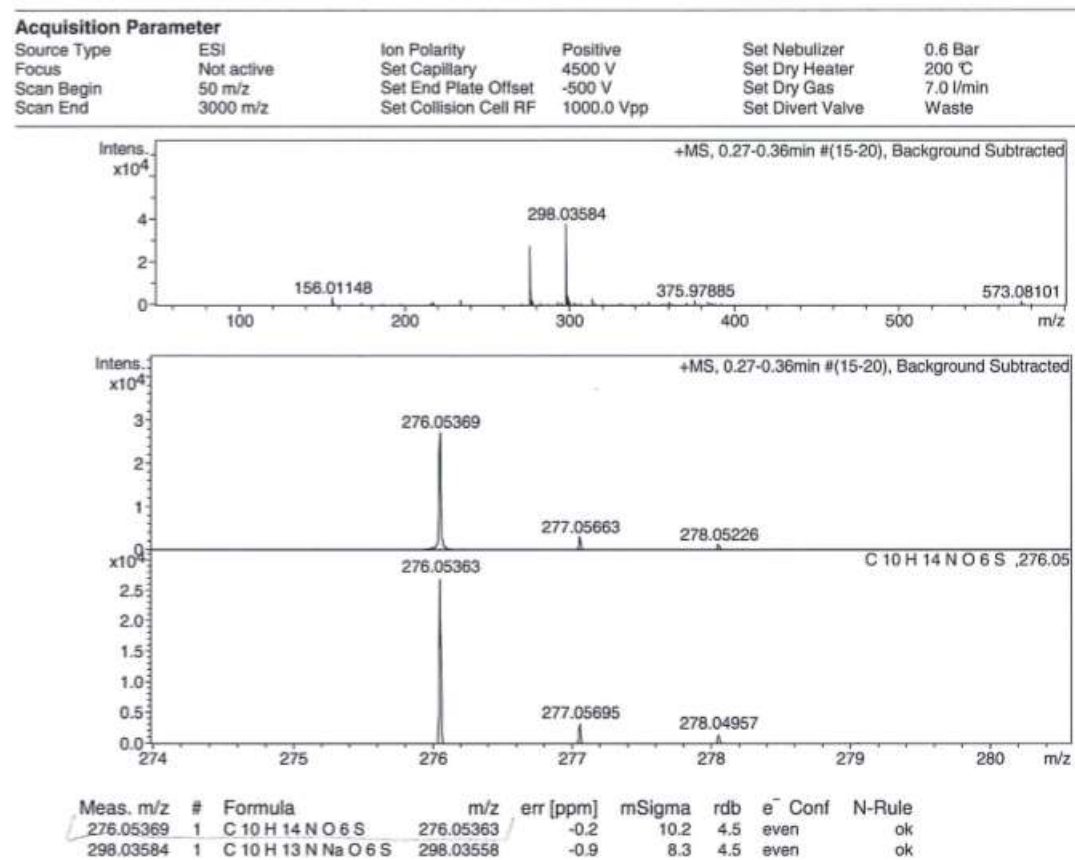

Figure S4. 4,5-Dihydro(3',5'-di-*O*-acetyl-1',2'-dideoxy- $\beta$ -*D*-arabinofuranoso)-[1,2-*d*]-oxazolidine-2-thione (5). HRMS (ESI).

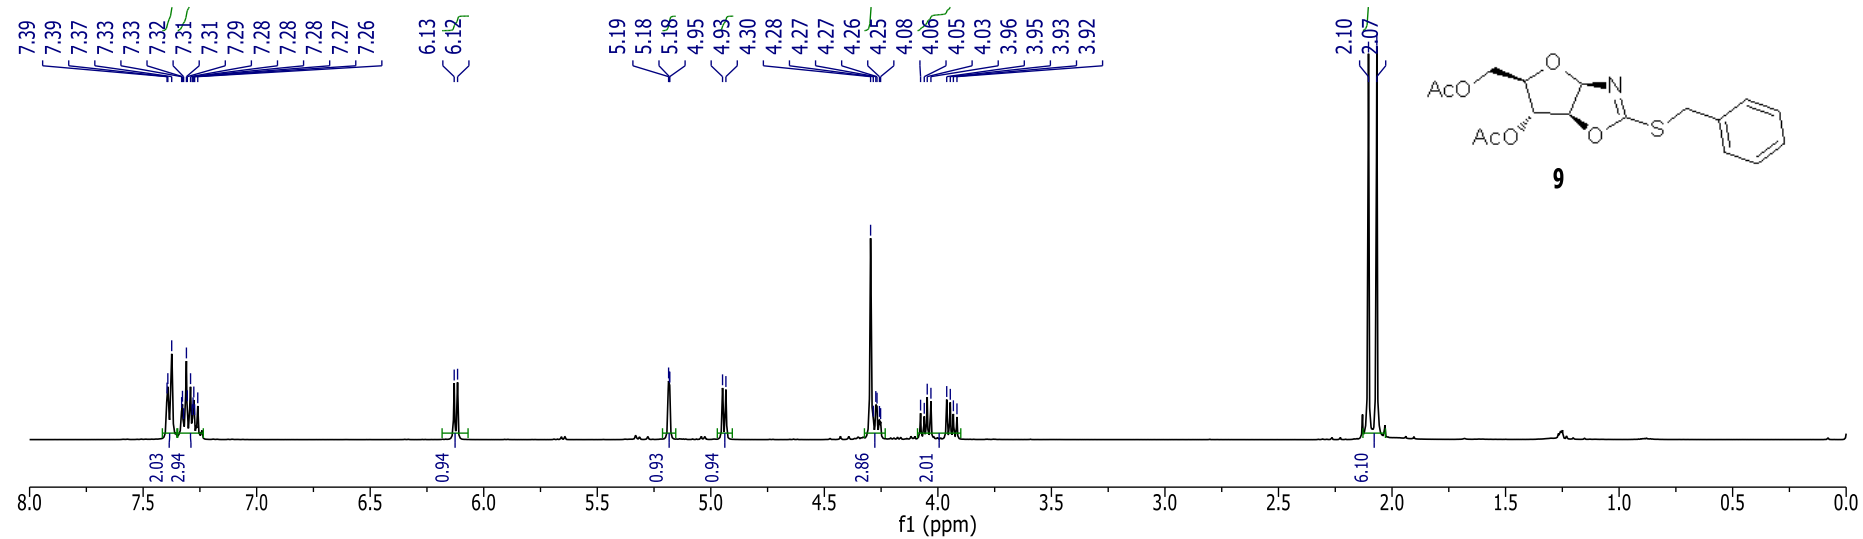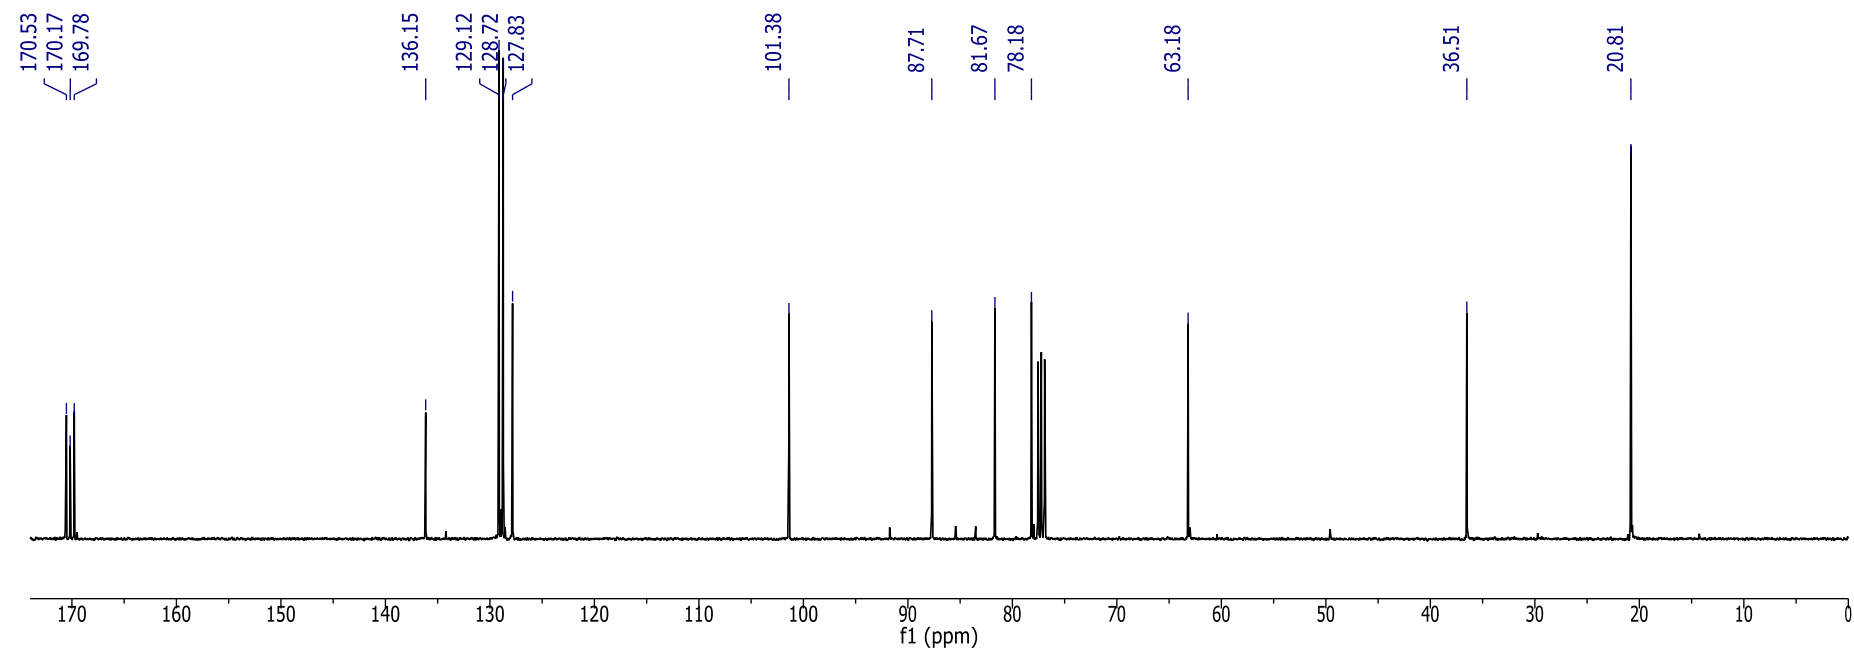

Figure S5. 2-Benzylsulfanyl-4,5-dihydro(3',5'-di-*O*-acetyl-1',2'-dideoxy- $\beta$ -*D*-arabinofuranoso)-[1,2-*d*]-oxazole (9).  $^1\text{H}$  NMR (400 MHz,  $\text{CDCl}_3$ ) and  $^{13}\text{C}$  NMR (100 MHz,  $\text{CDCl}_3$ ) spectrums.

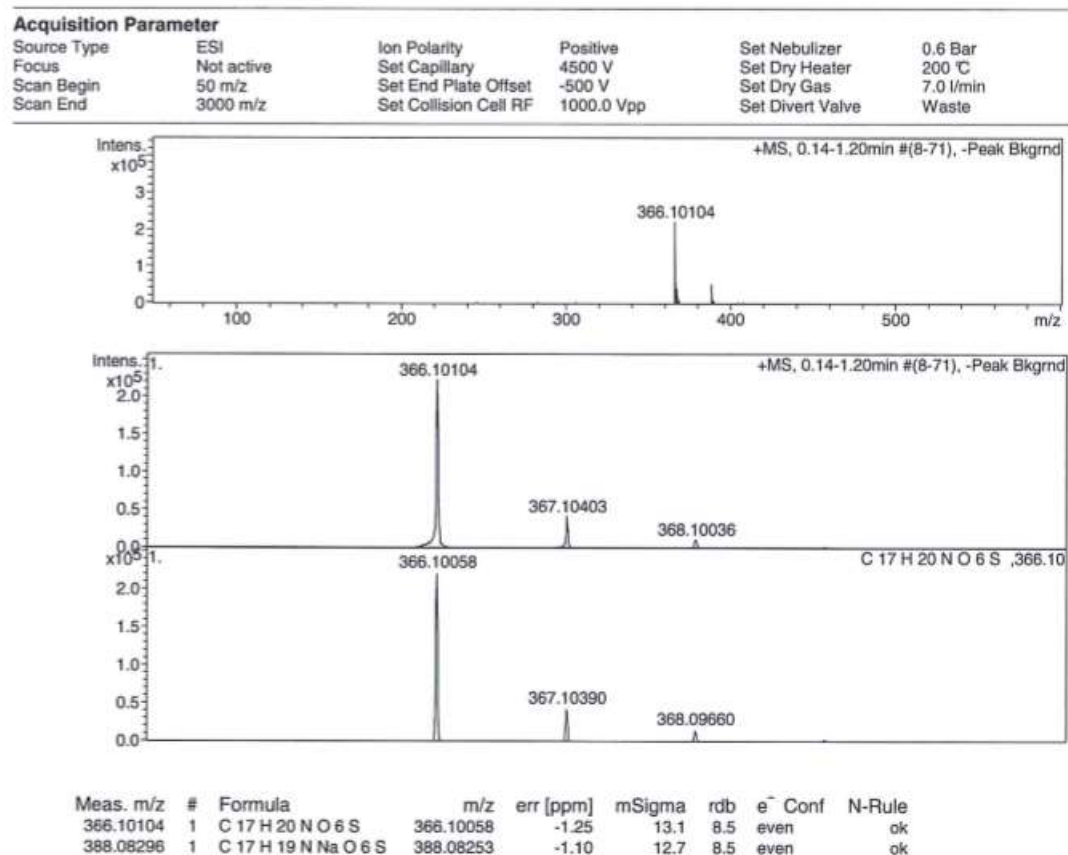

Figure S6. 2-Benzylsulfanyl-4,5-dihydro(3',5'-di-*O*-acetyl-1',2'-dideoxy- $\beta$ -*D*-arabinofuranoso)-[1,2-*d*]-oxazole (9). HRMS (ESI).

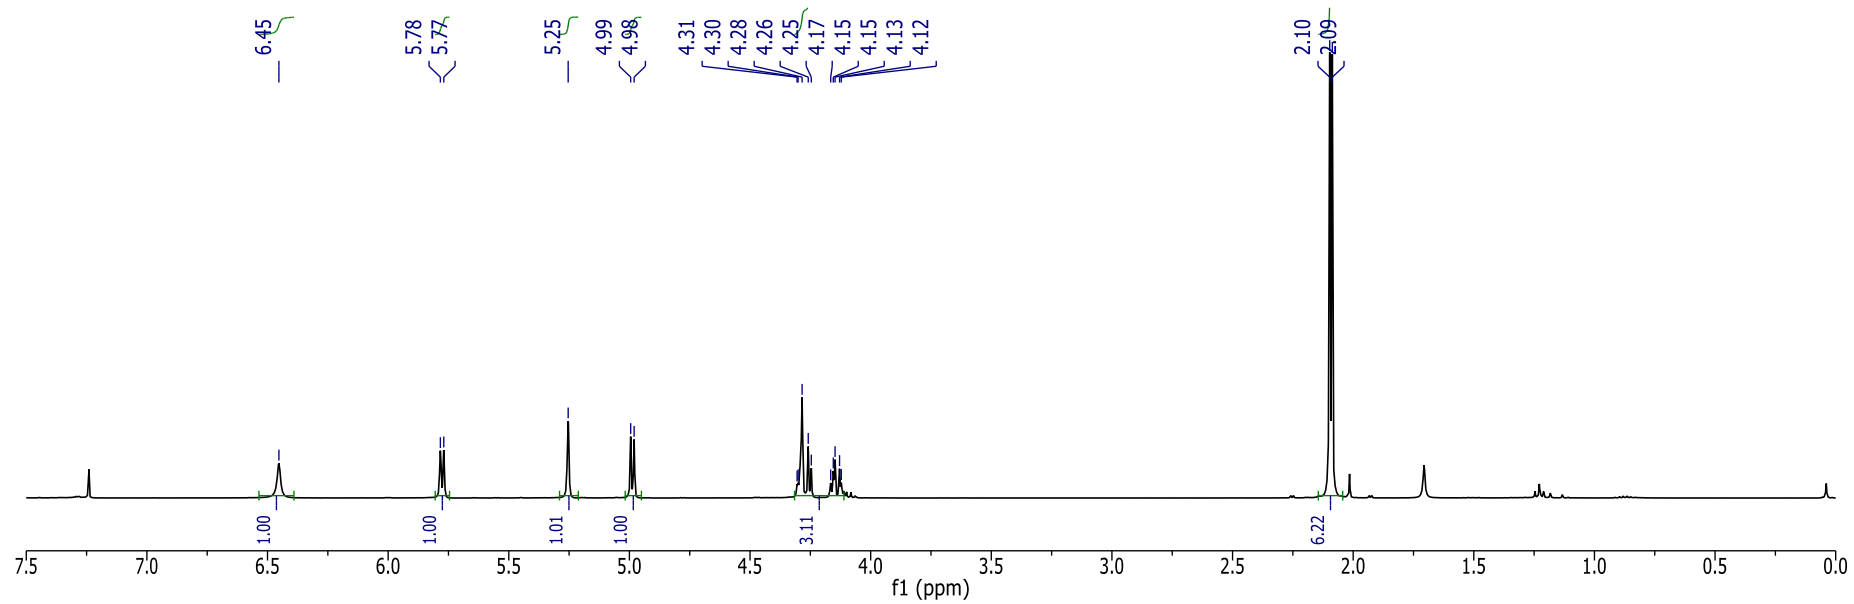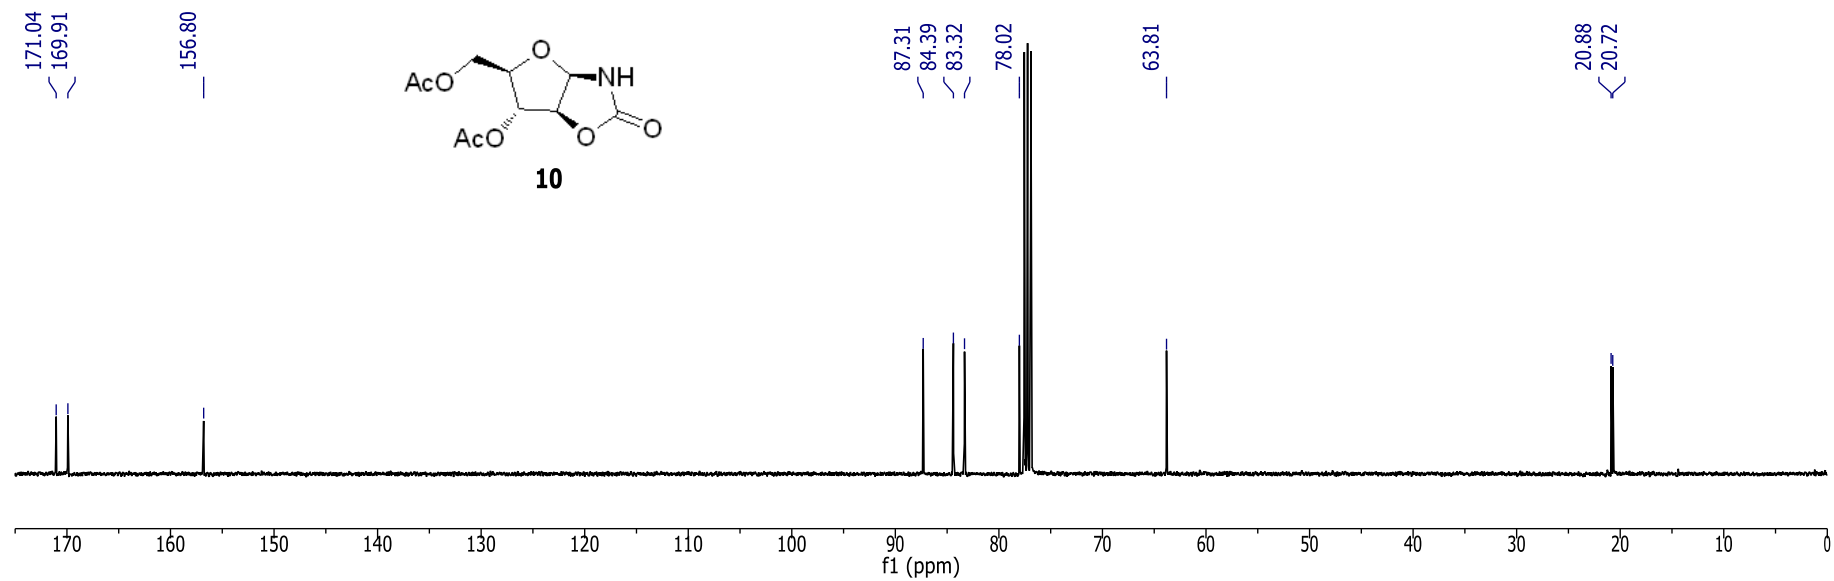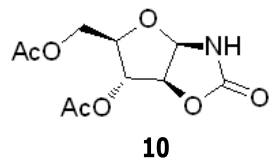



**Figure S7.** 4,5-Dihydro(3',5'-di-*O*-acetyl-1',2'-dideoxy- $\beta$ -*D*-arabinofuranoso)-[1,2-*d*]-oxazolidine-2-one (10).  $^1\text{H}$  NMR (400 MHz,  $\text{CDCl}_3$ ) and  $^{13}\text{C}$  NMR (100 MHz,  $\text{CDCl}_3$ ) spectra.

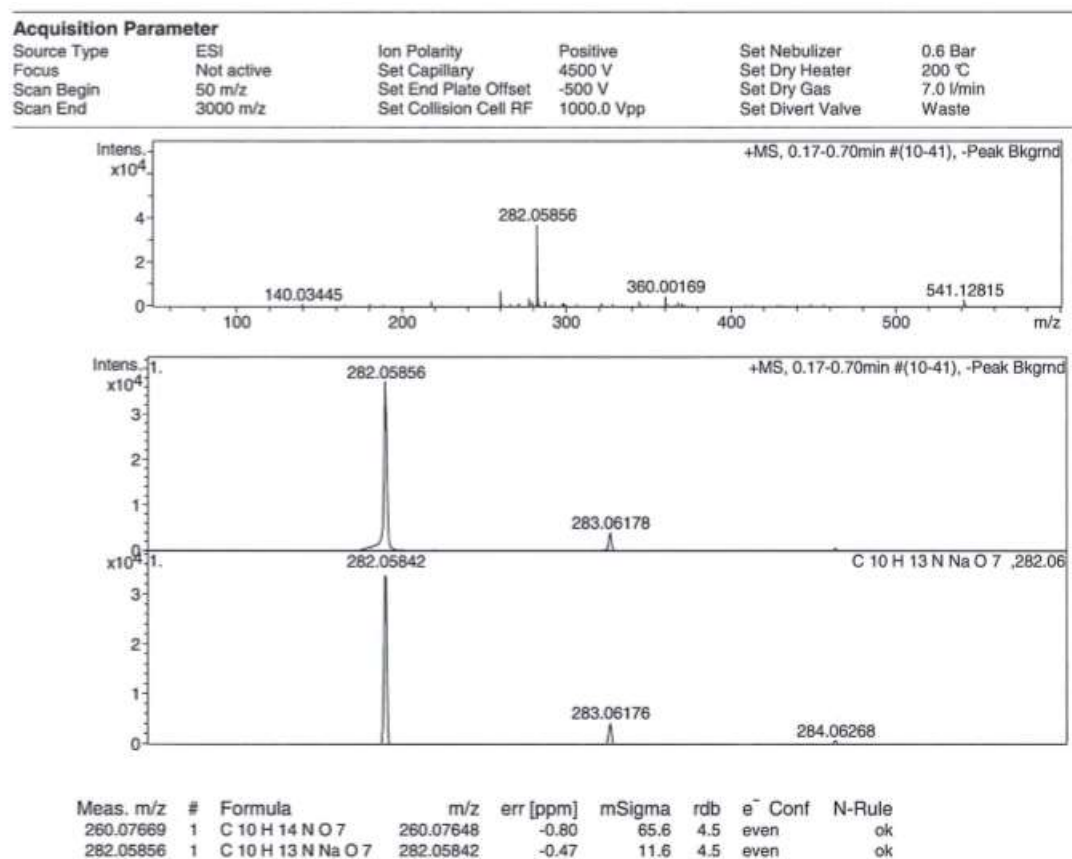

**Figure S8.** 4,5-Dihydro(3',5'-di-*O*-acetyl-1',2'-dideoxy- $\beta$ -*D*-arabinofuranoso)-[1,2-*d*]-oxazolidine-2-one (10). HRMS (ESI).



Figure S9. 4,5-Dihydro(3',5'-di-*O*-*tert*-butyldimethylsilyl-1',2'-dideoxy- $\beta$ -*D*-arabinofuranoso)-[1,2-*d*]-oxazolidine-2-thione (6).  $^1\text{H}$  NMR (400 MHz,  $\text{CDCl}_3$ ) and  $^{13}\text{C}$  NMR (100 MHz,  $\text{CDCl}_3$ ) spectra.

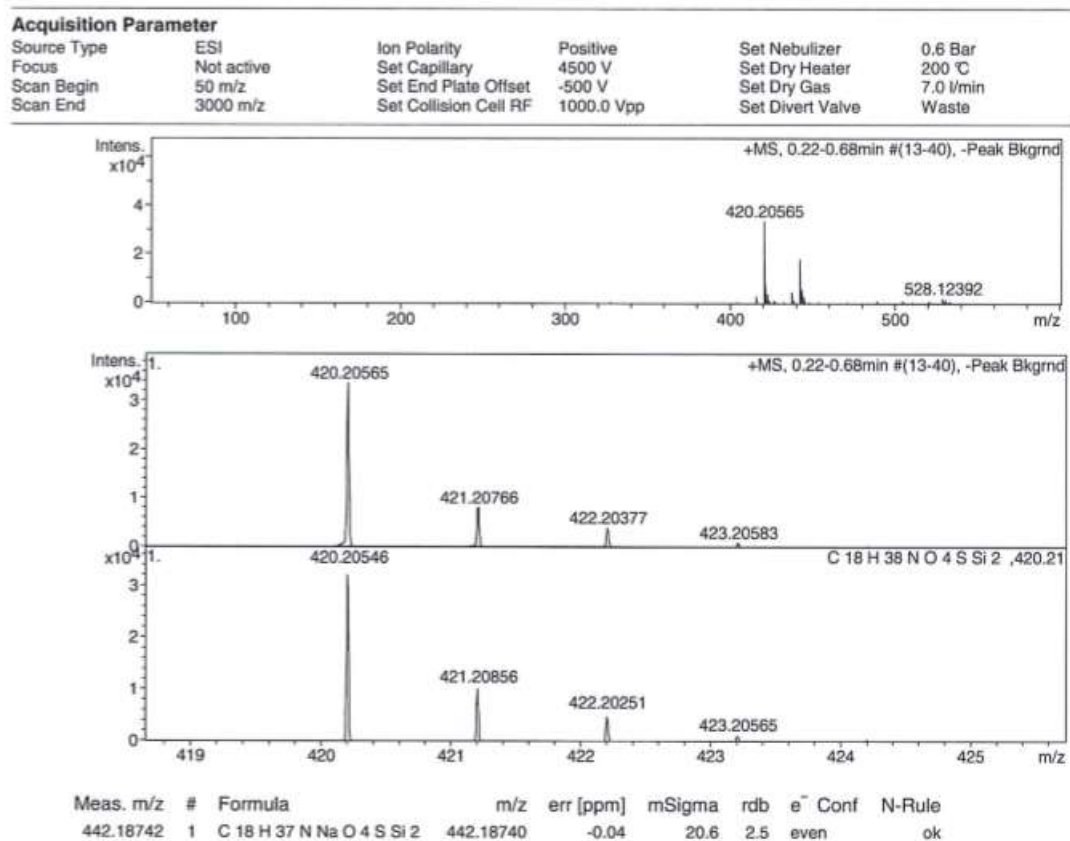

Figure S10. 4,5-Dihydro(3',5'-di-*O*-*tert*-butyldimethylsilyl-1',2'-dideoxy- $\beta$ -*D*-arabinofuranoso)-[1,2-*d*]-oxazolidine-2-thione (6). HRMS (ESI).

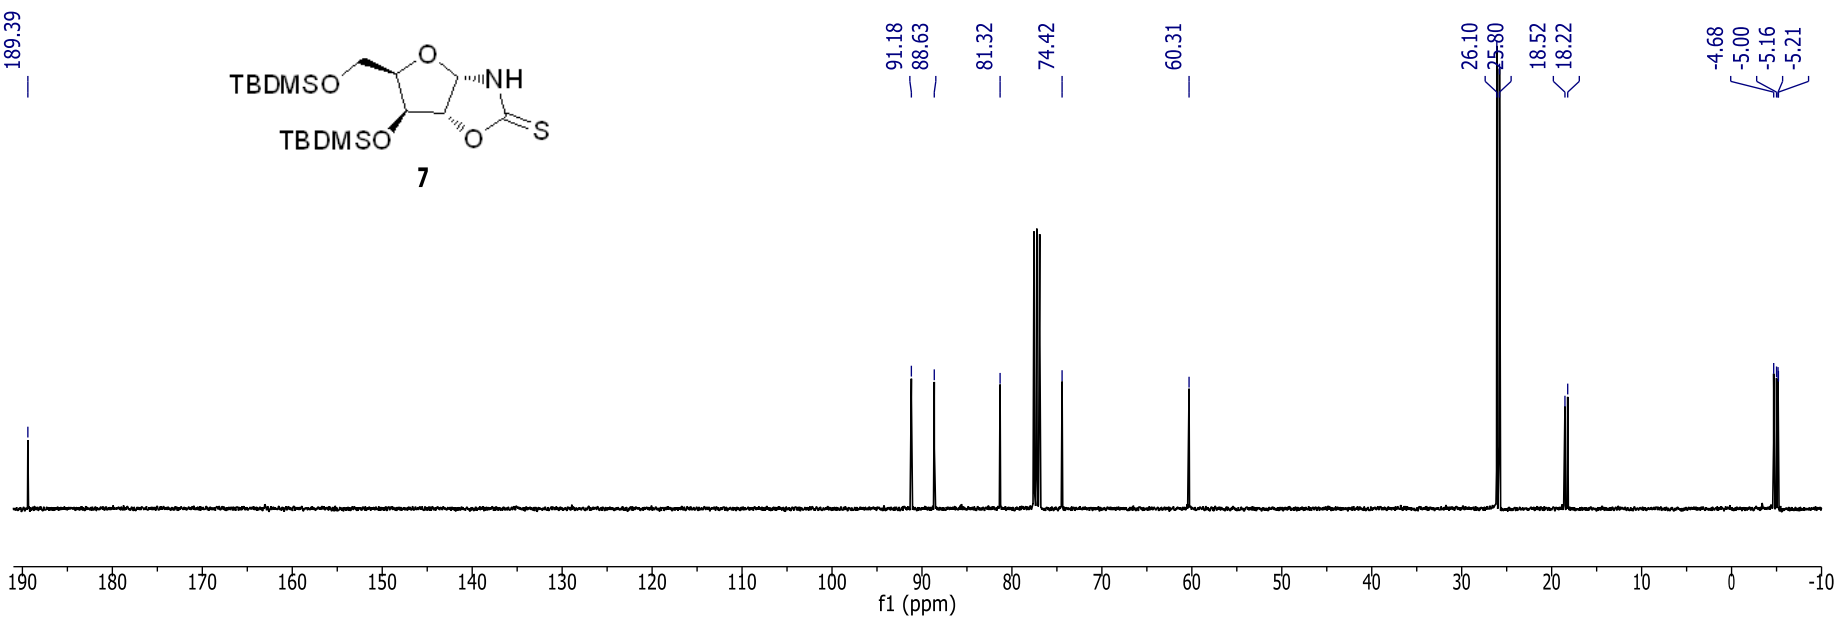

Figure S11. 4,5-Dihydro(3',5'-di-*O*-*tert*-butyldimethylsilyl-1',2'-dideoxy- $\alpha$ -*D*-xylofuranoso)-[1,2-*d*]-oxazolidine-2-thione (7).  $^1\text{H}$  NMR (400 MHz,  $\text{CDCl}_3$ ) and  $^{13}\text{C}$  NMR (100 MHz,  $\text{CDCl}_3$ ) spectra.

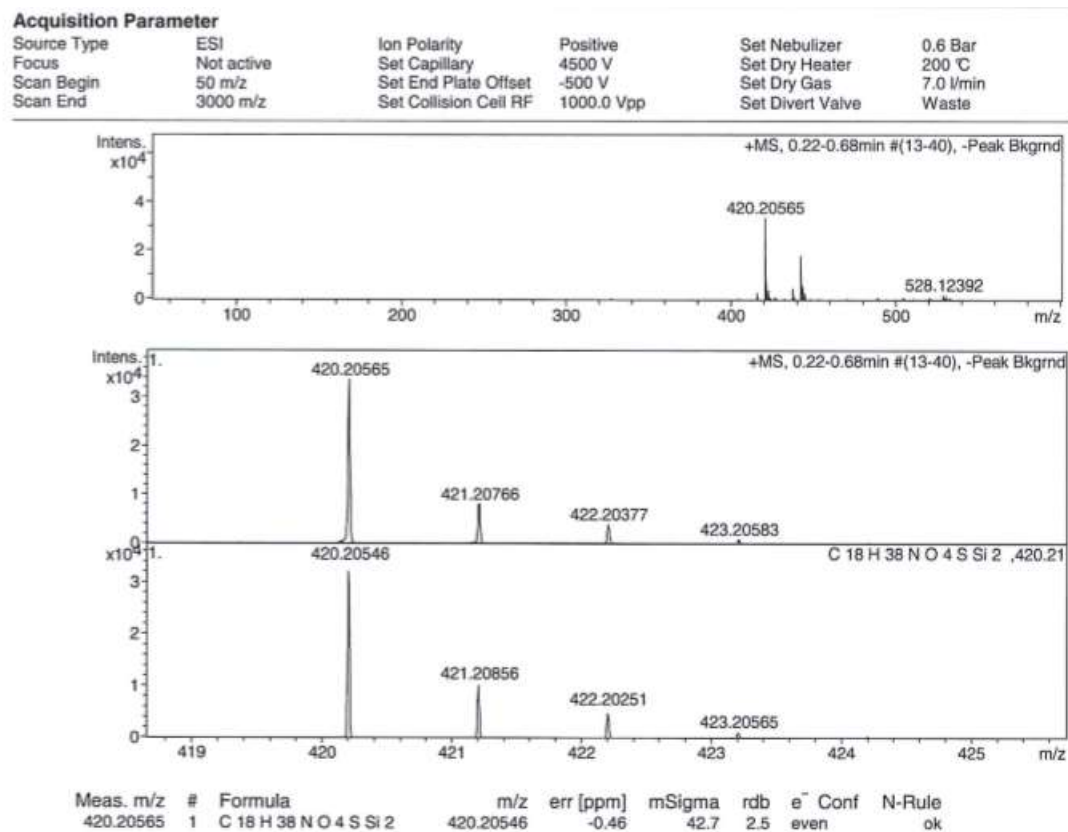

Figure S12. 4,5-Dihydro(3',5'-di-*O*-*tert*-butyldimethylsilyl-1',2'-dideoxy- $\alpha$ -*D*-xylofuranoso)-[1,2-*d*]-oxazolidine-2-thione (7). HRMS (ESI).

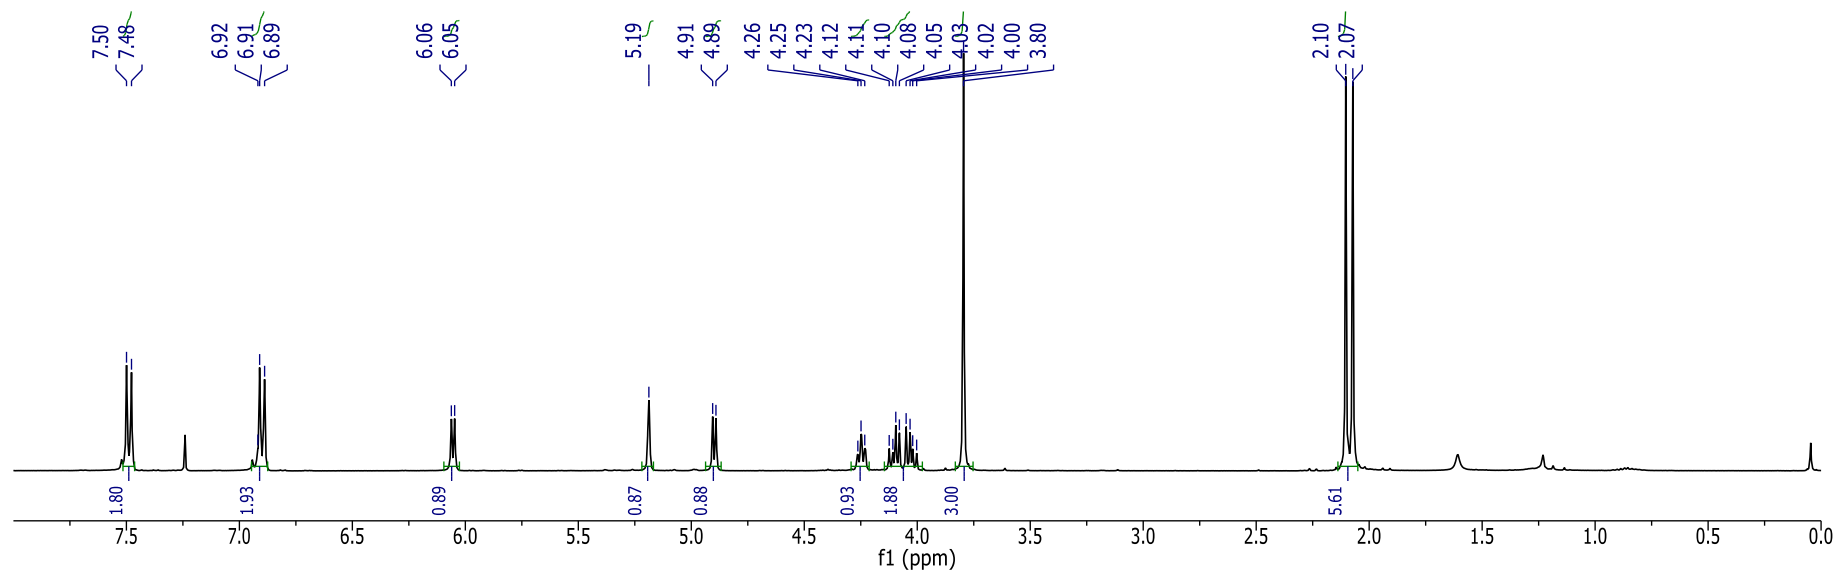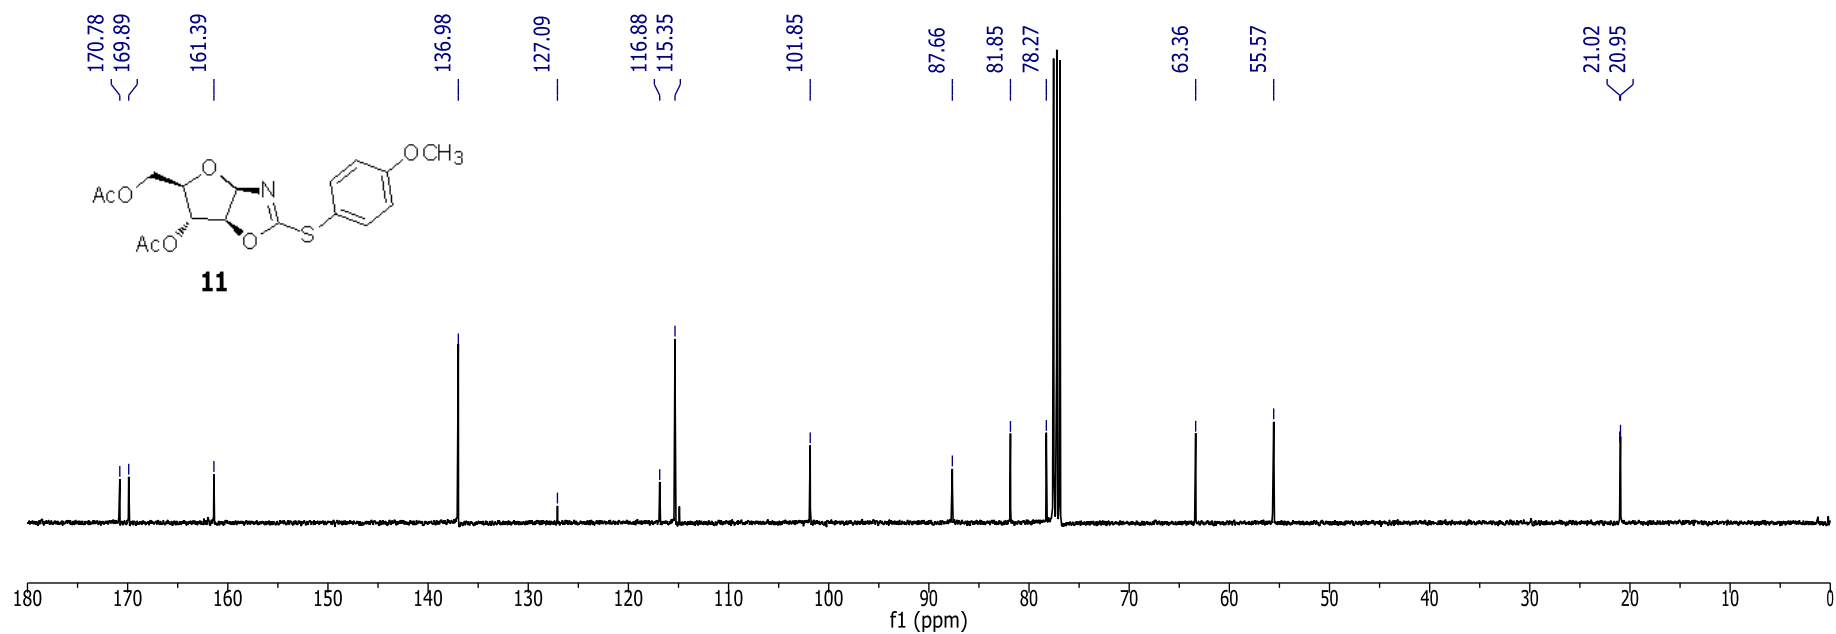

**Figure S13.** 2-[(4-Methoxyphenyl)sulfanyl]-4,5-dihydro(3',5'-di-*O*-acetyl-1',2'-dideoxy- $\beta$ -*D*-arabinofuranoso)-[1,2-*d*]-oxazole (11).  $^1\text{H}$  NMR (400 MHz,  $\text{CDCl}_3$ ) and  $^{13}\text{C}$  NMR (100 MHz,  $\text{CDCl}_3$ ) spectra.

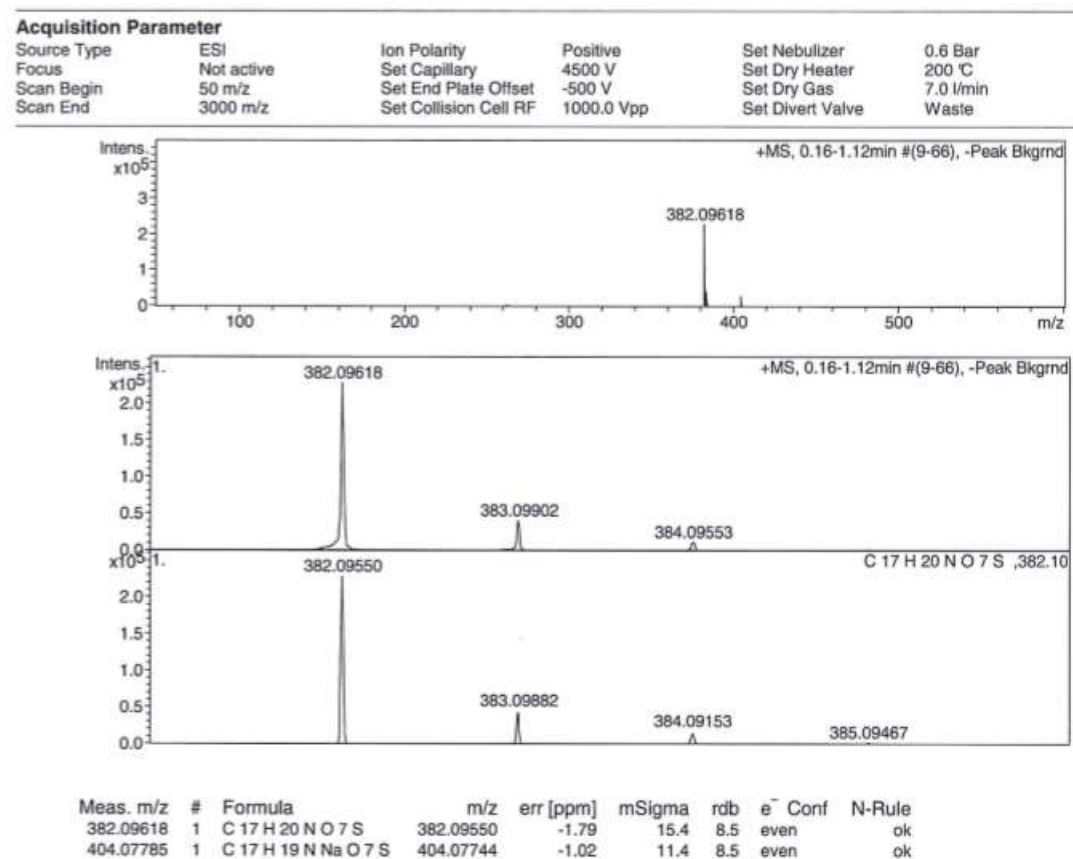

**Figure S14.** 2-[(4-Methoxyphenyl)sulfanyl]-4,5-dihydro(3',5'-di-*O*-acetyl-1',2'-dideoxy- $\beta$ -*D*-arabinofuranoso)-[1,2-*d*]-oxazole (11). HRMS (ESI).

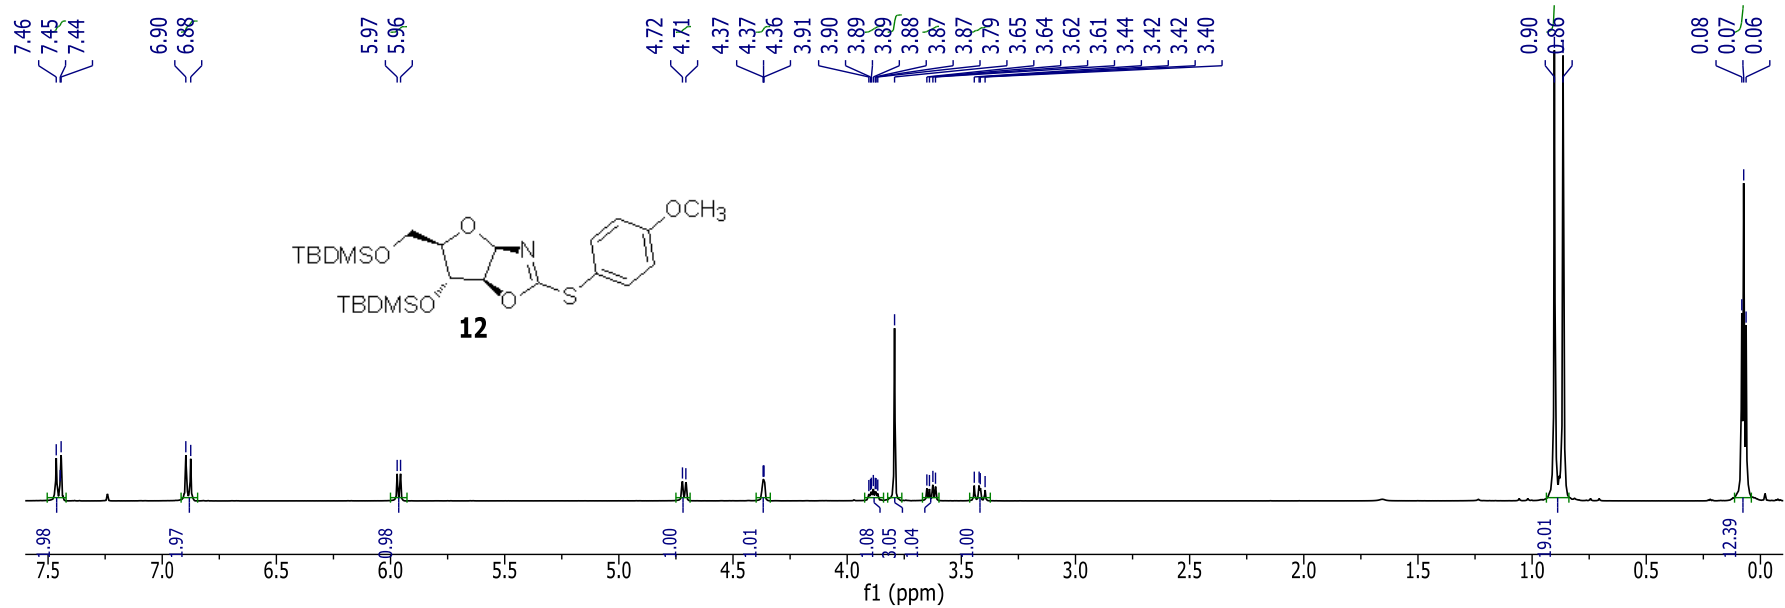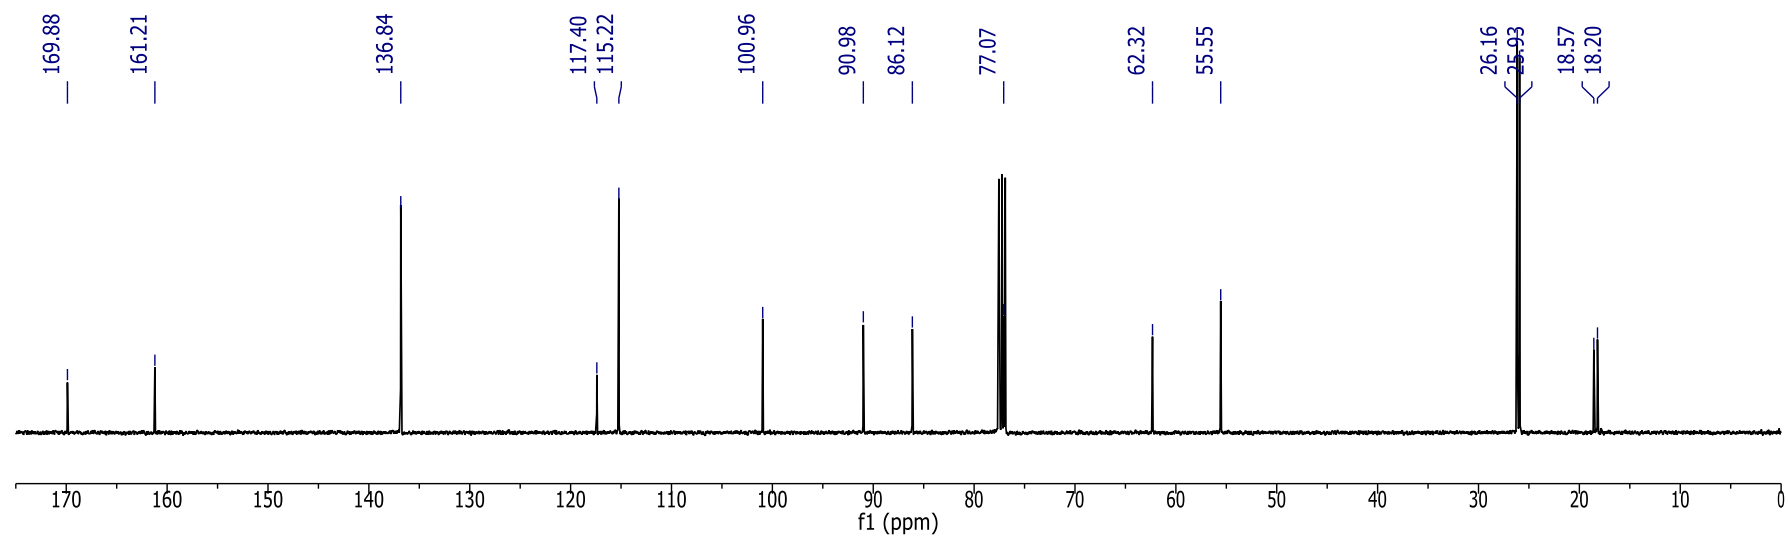



**Figure S15.** 2-[(4-Methoxyphenyl)sulfanyl]-4,5-dihydro(3',5'-di-*O*-*tert*-1',2'-dideoxy- $\beta$ -*D*-arabinofuranoso)-[1,2-*d*]-oxazole (12).  $^1\text{H}$  NMR (400 MHz,  $\text{CDCl}_3$ ) and  $^{13}\text{C}$  NMR (100 MHz,  $\text{CDCl}_3$ ) spectrums.

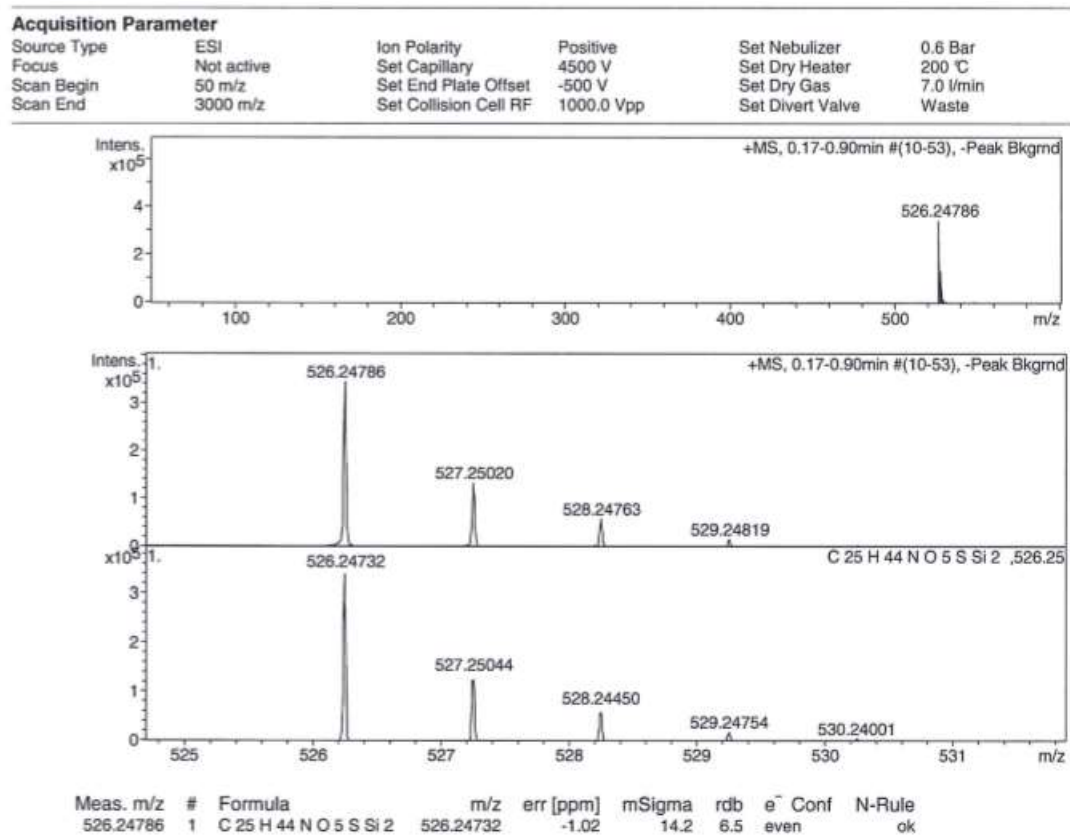

**Figure S16.** 2-[(4-Methoxyphenyl)sulfanyl]-4,5-dihydro(3',5'-di-*O*-*tert*-1',2'-dideoxy- $\beta$ -*D*-arabinofuranoso)-[1,2-*d*]-oxazole (12). HRMS (ESI).

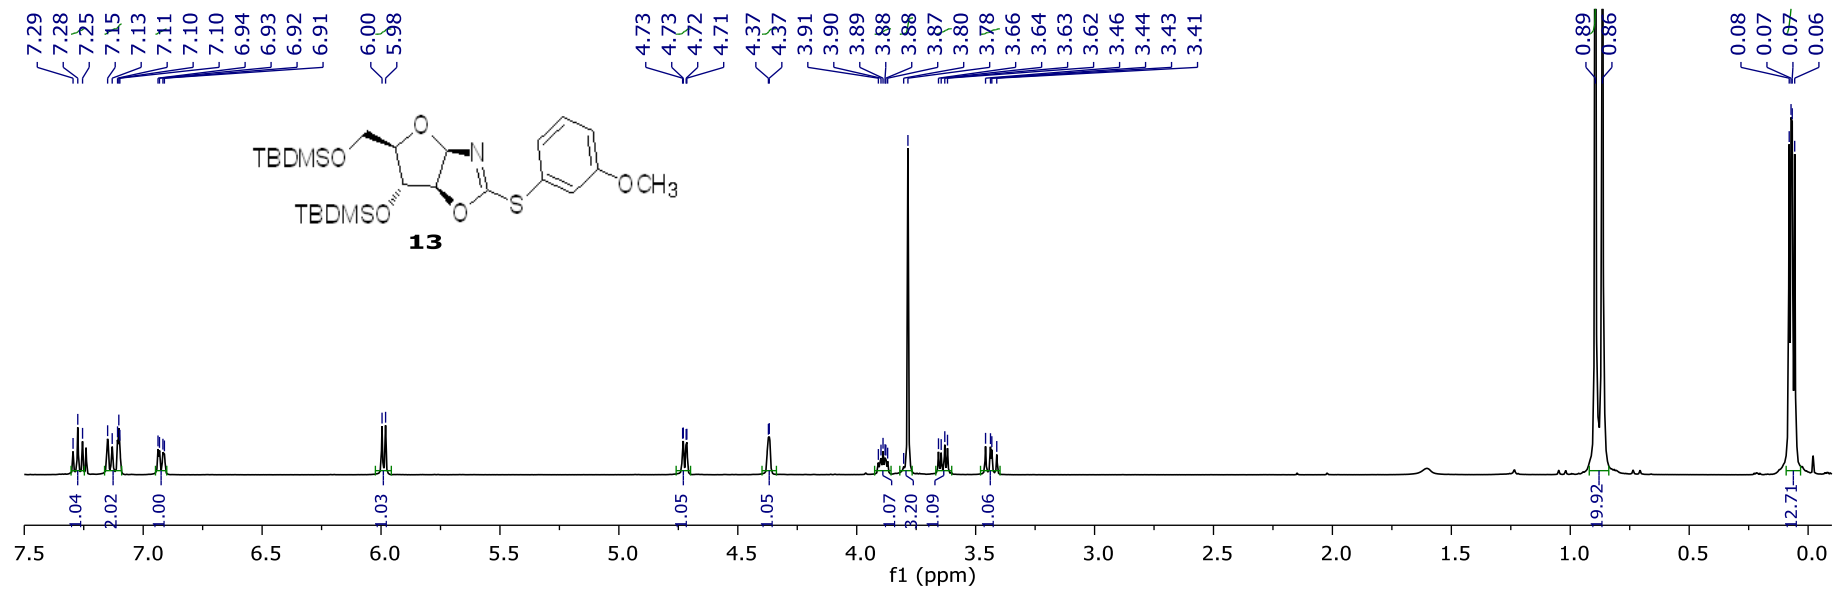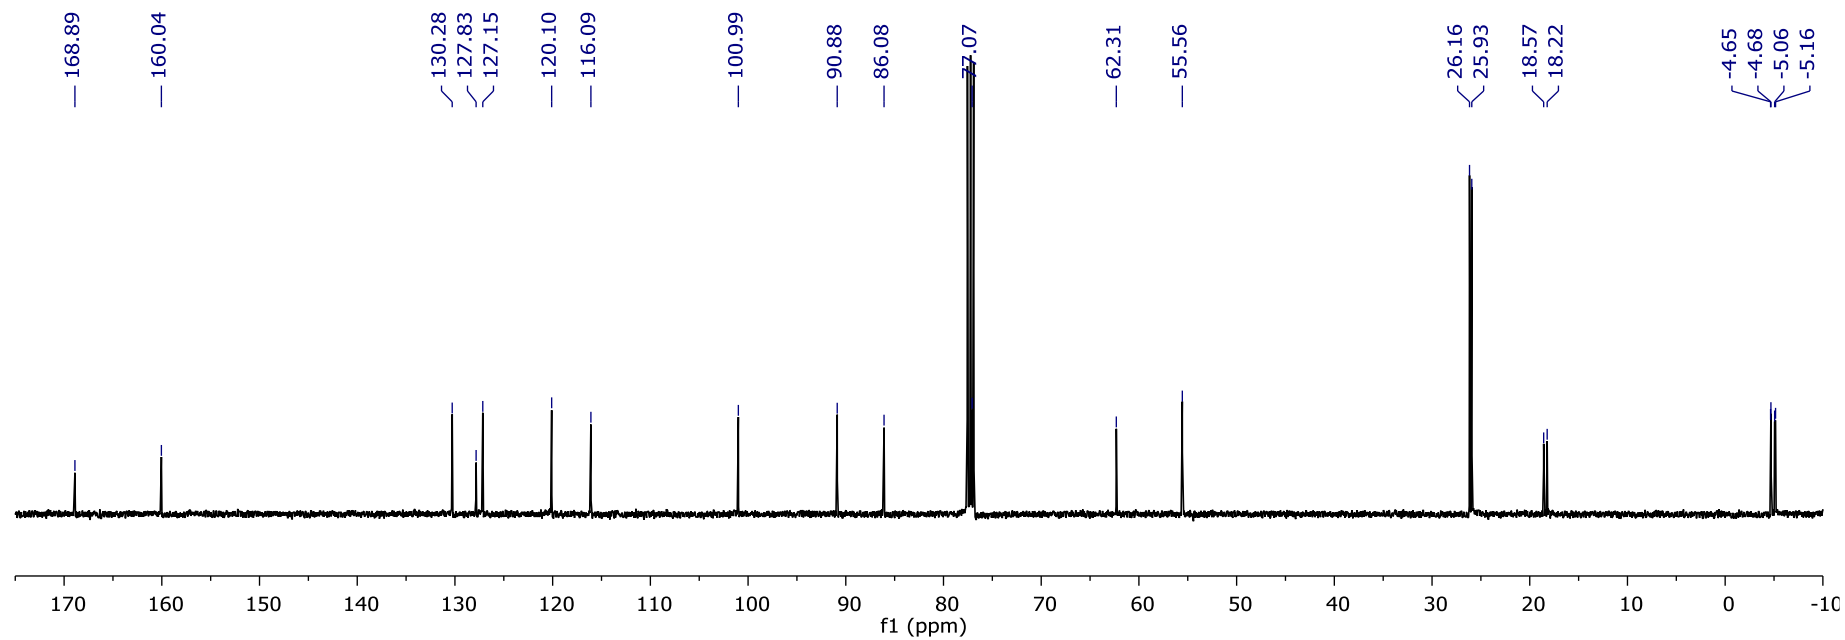

Figure S17. 2-[(3-Methoxyphenyl)sulfanyl]-4,5-dihydro(3',5'-di-*O*-*tert*-1',2'-dideoxy- $\beta$ -D-arabinofuranoso)-[1,2-*d*]-oxazole (13).  $^1\text{H}$  NMR (400 MHz,  $\text{CDCl}_3$ ) and  $^{13}\text{C}$  NMR (100 MHz,  $\text{CDCl}_3$ ) spectrums.

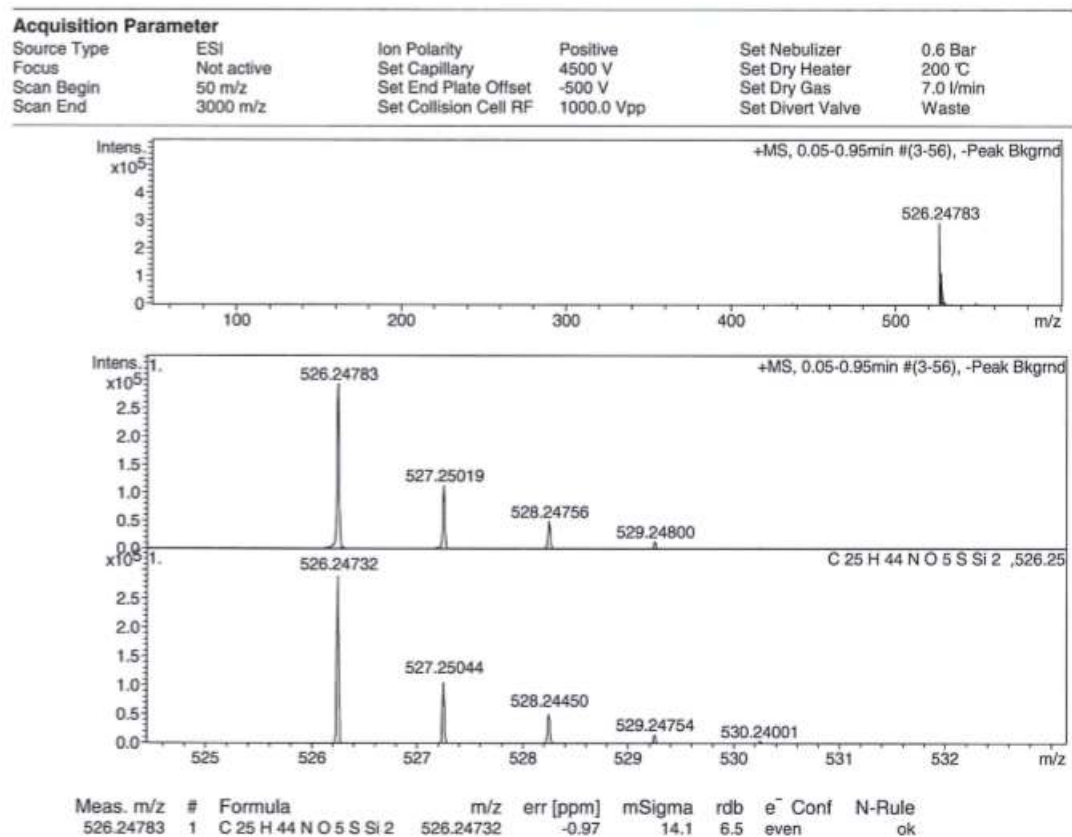

Figure S18. 2-[(3-Methoxyphenyl)sulfanyl]-4,5-dihydro(3',5'-di-*O*-*tert*-1',2'-dideoxy- $\beta$ -D-arabinofuranoso)-[1,2-*d*]-oxazole (13). HRMS (ESI).

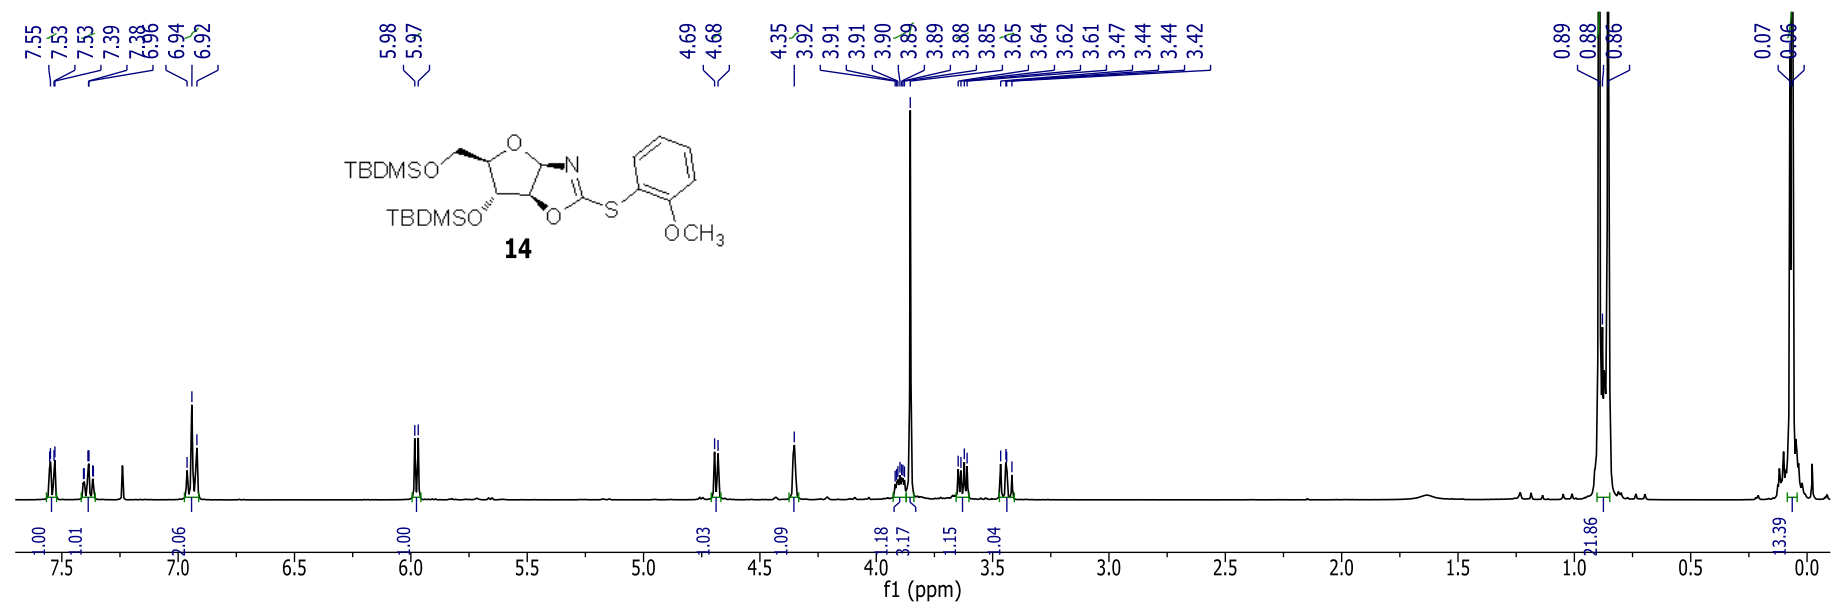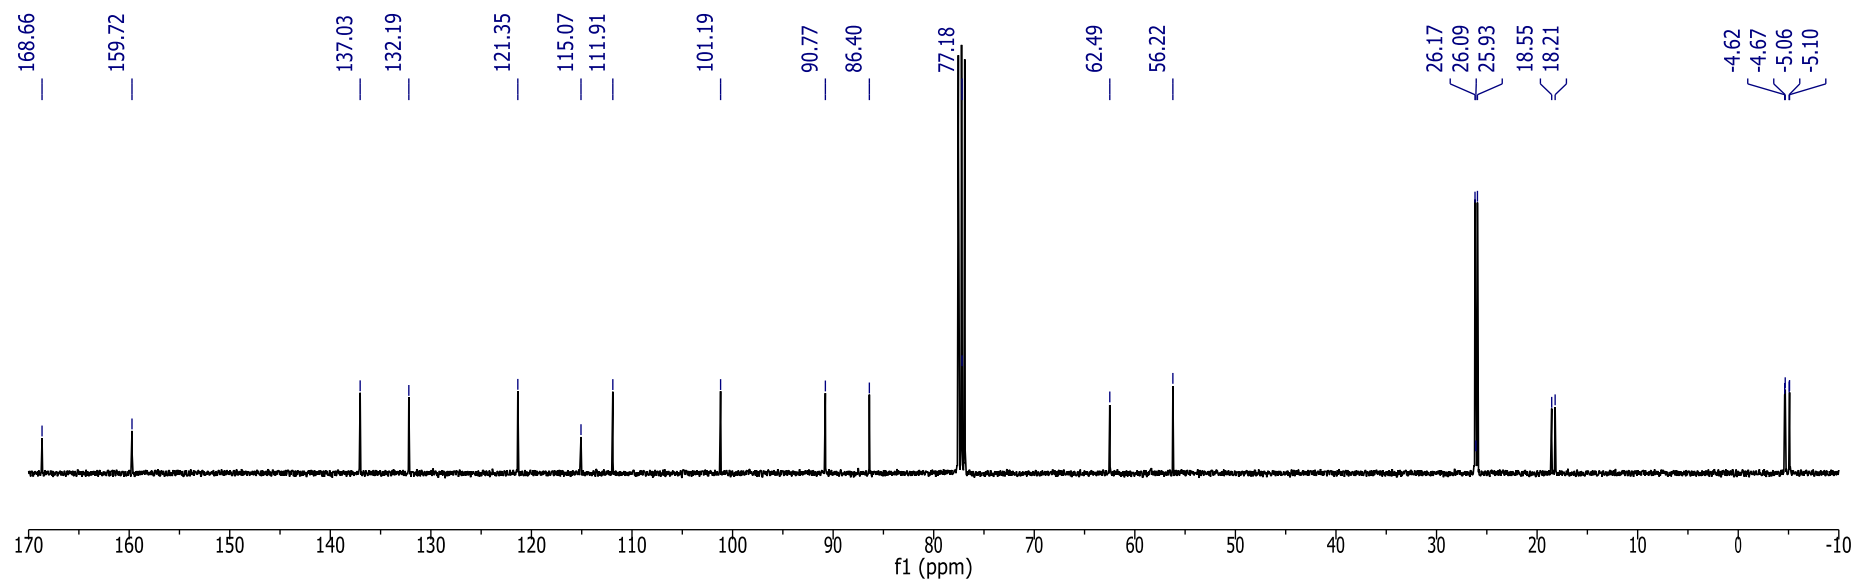

Figure S19. 2-[(2-Methoxyphenyl)sulfanyl]-4,5-dihydro(3',5'-di-*O*-*tert*-1',2'-dideoxy- $\beta$ -*D*-arabinofuranoso)-[1,2-*d*]-oxazole (14).  $^1\text{H}$  NMR (400 MHz,  $\text{CDCl}_3$ ) and  $^{13}\text{C}$  NMR (100 MHz,  $\text{CDCl}_3$ ) spectrums.

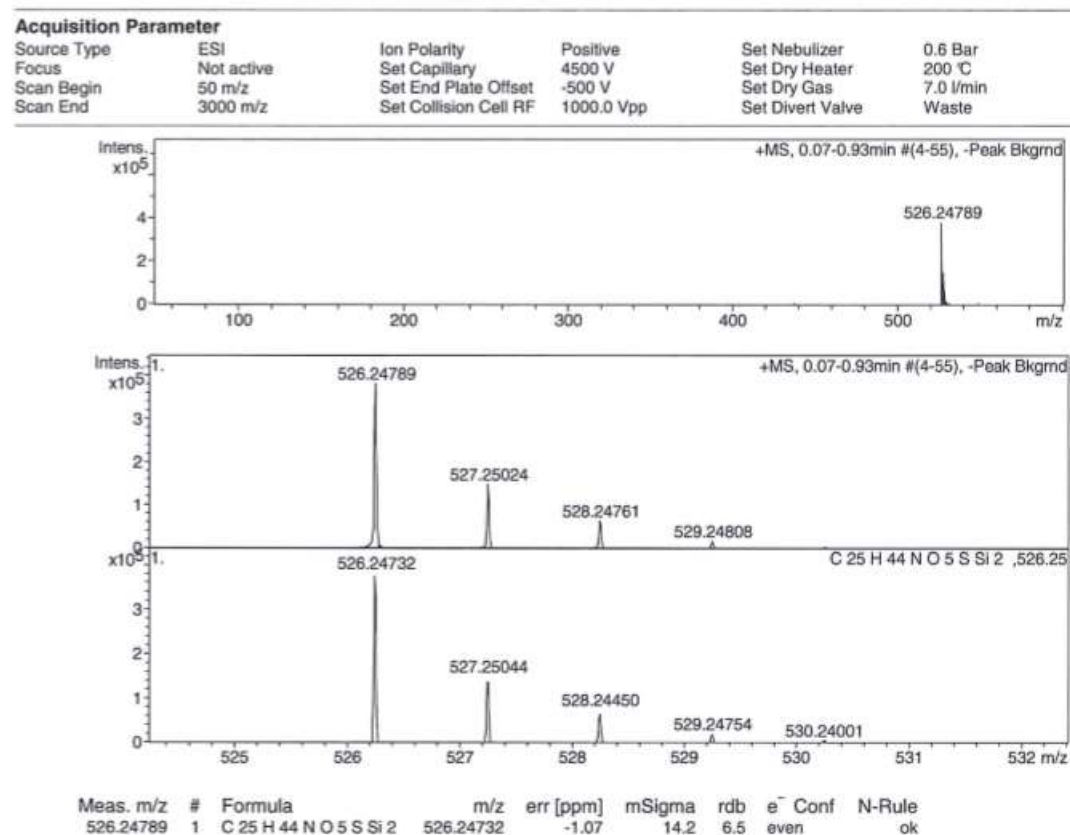

Figure S20. 2-[(2-Methoxyphenyl)sulfanyl]-4,5-dihydro(3',5'-di-*O*-*tert*-1',2'-dideoxy- $\beta$ -*D*-arabinofuranoso)-[1,2-*d*]-oxazole (14). HRMS (ESI).

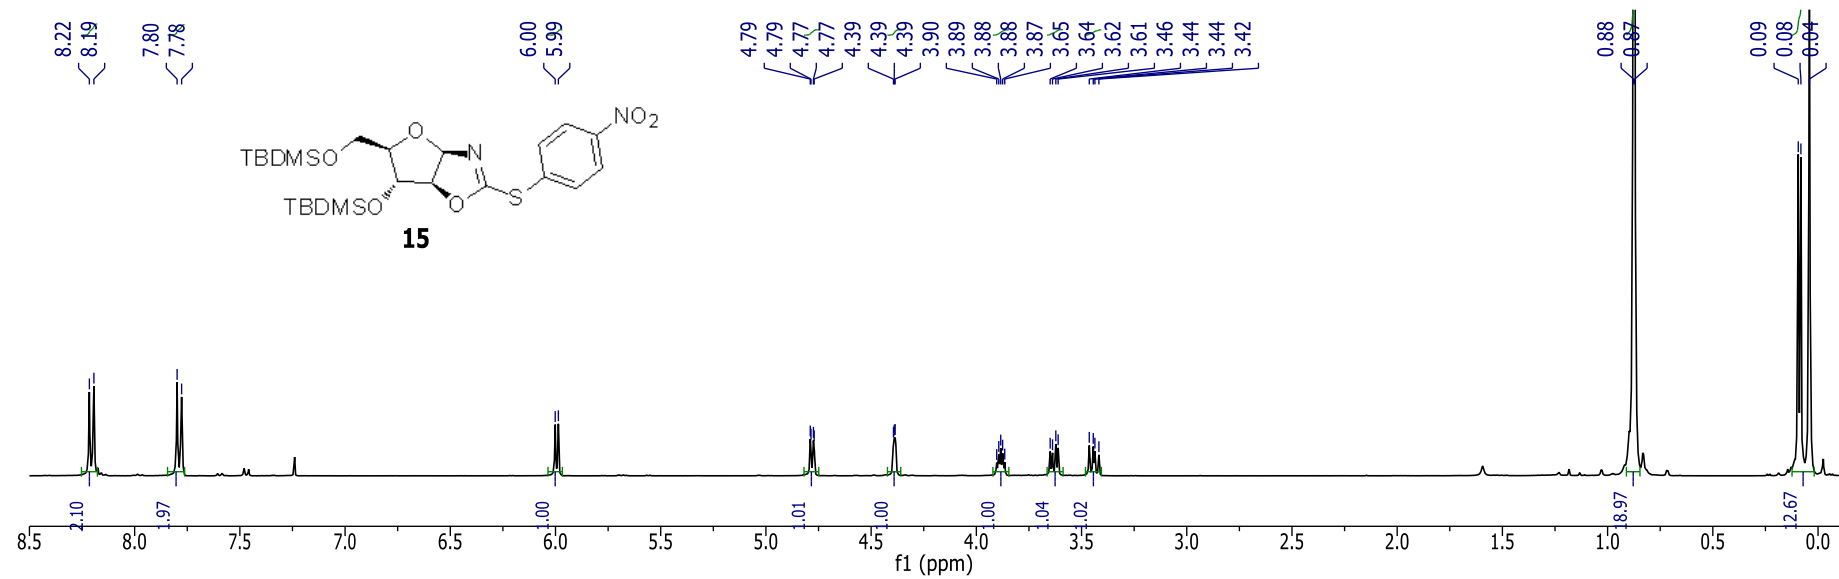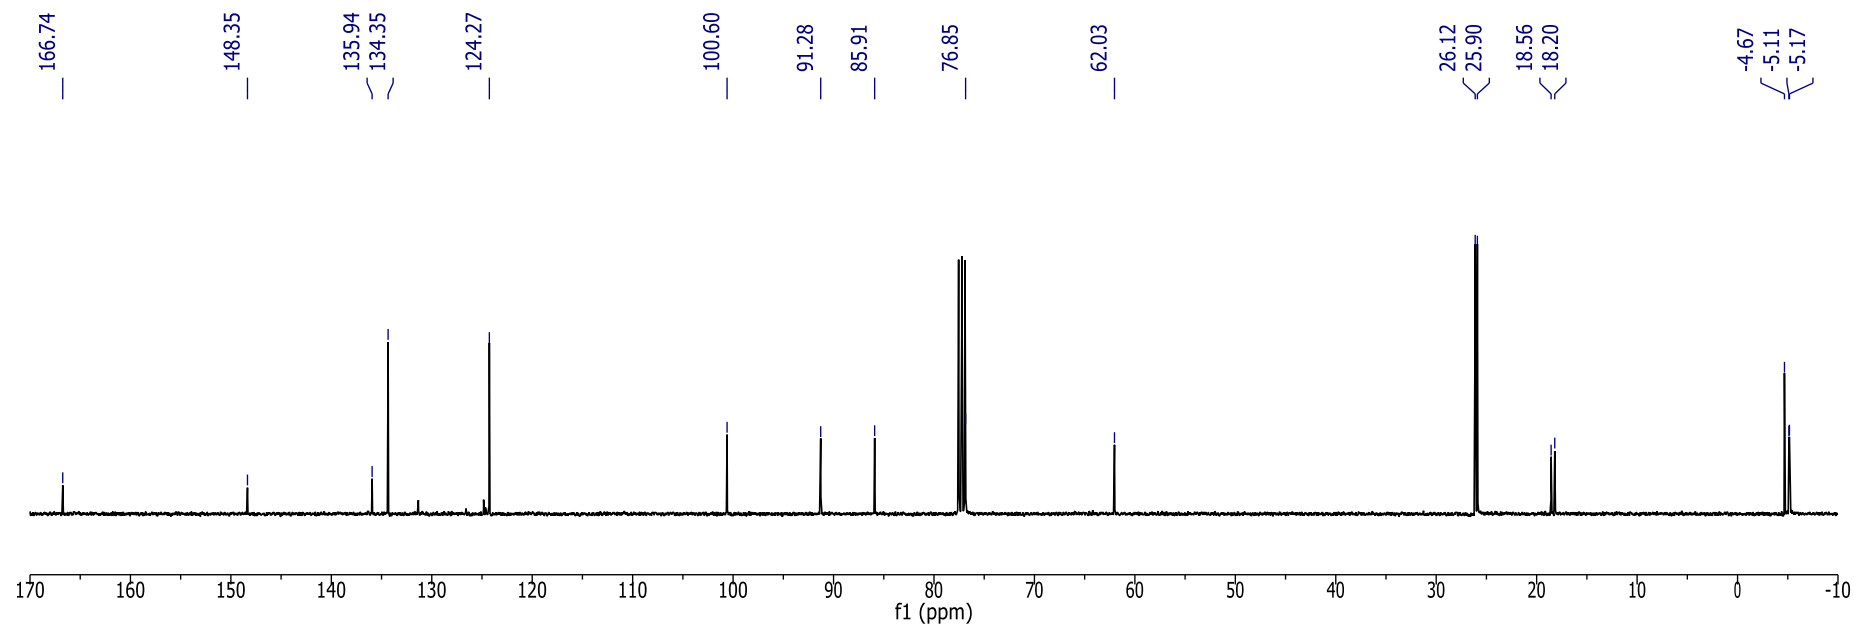

Figure S21. 2-[(4-Nitrophenyl)sulfanyl]-4,5-dihydro(3',5'-di-*O*-*tert*-1',2'-dideoxy- $\beta$ -*D*-arabinofuranoso)-[1,2-*d*]-oxazole (15).  $^1\text{H}$  NMR (400 MHz,  $\text{CDCl}_3$ ) and  $^{13}\text{C}$  NMR (100 MHz,  $\text{CDCl}_3$ ) spectrums.

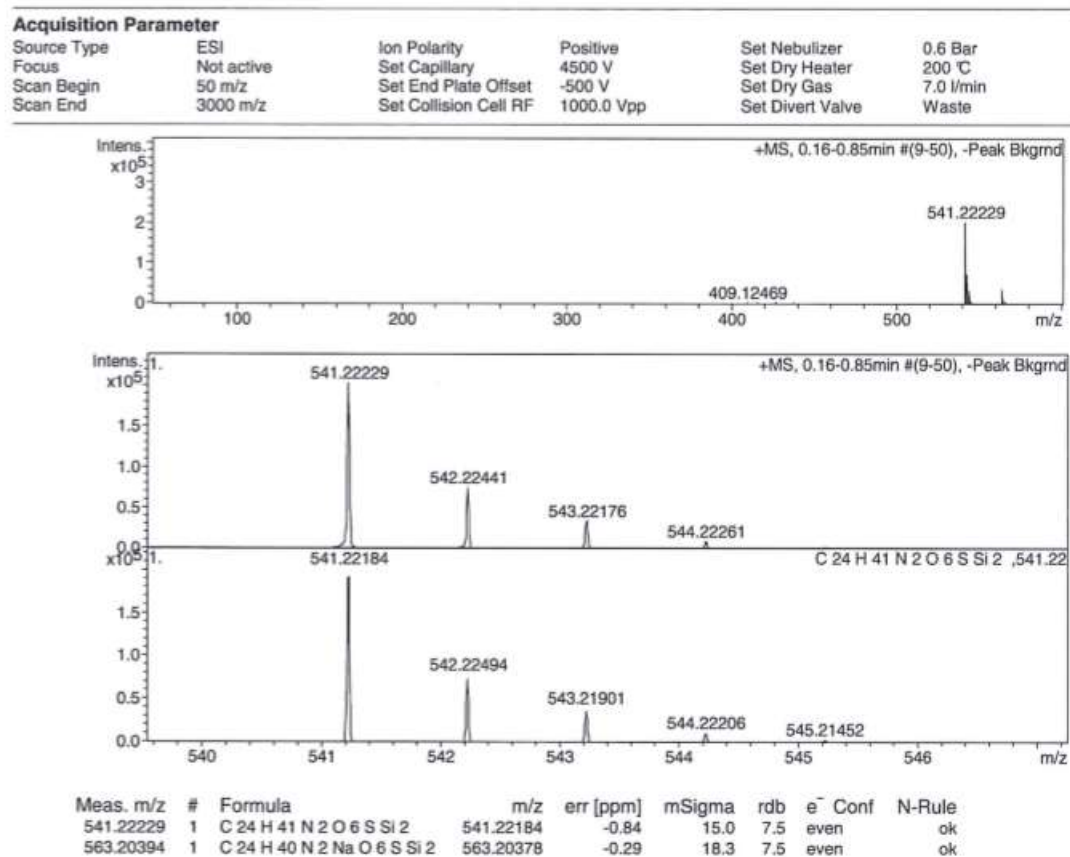

Figure S22. 2-[(4-Nitrophenyl)sulfanyl]-4,5-dihydro(3',5'-di-*O*-*tert*-1',2'-dideoxy- $\beta$ -*D*-arabinofuranoso)-[1,2-*d*]-oxazole (15). HRMS (ESI).

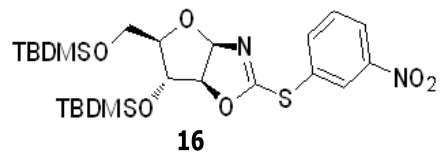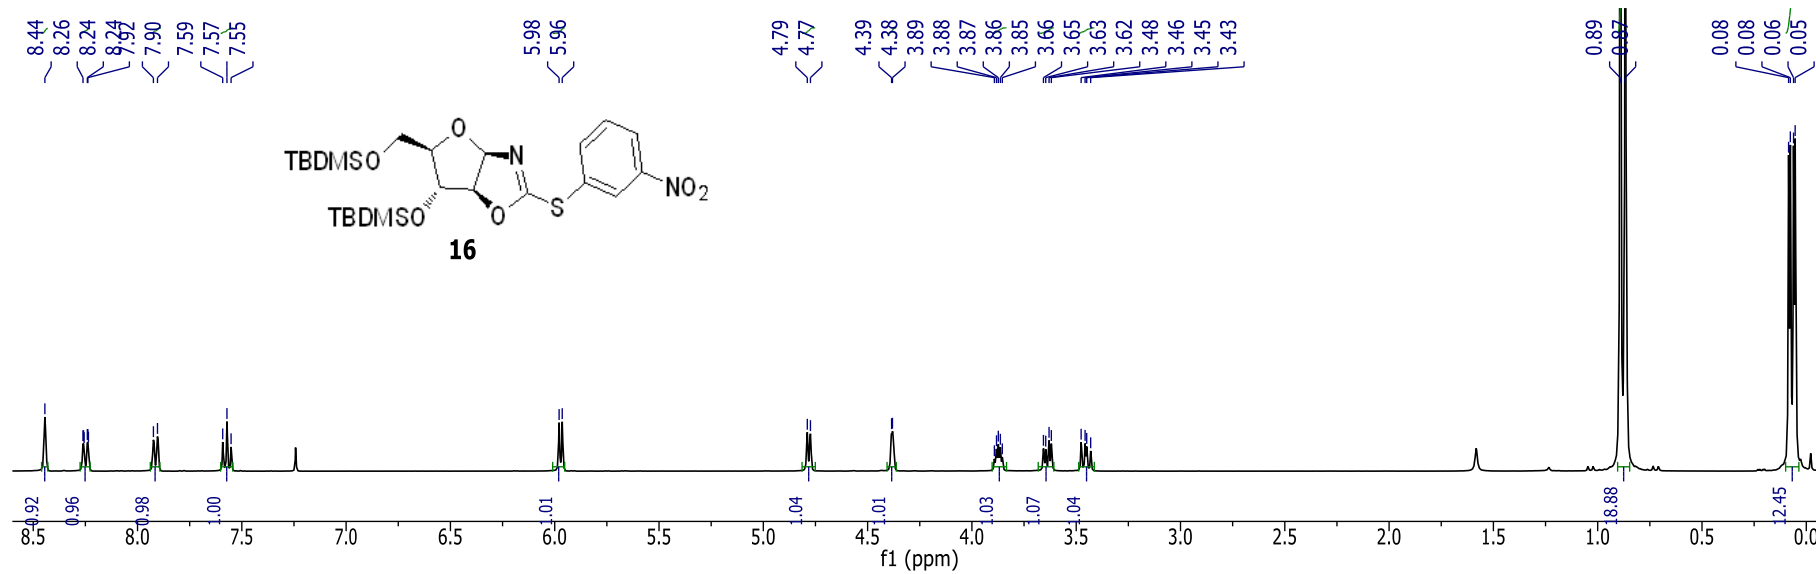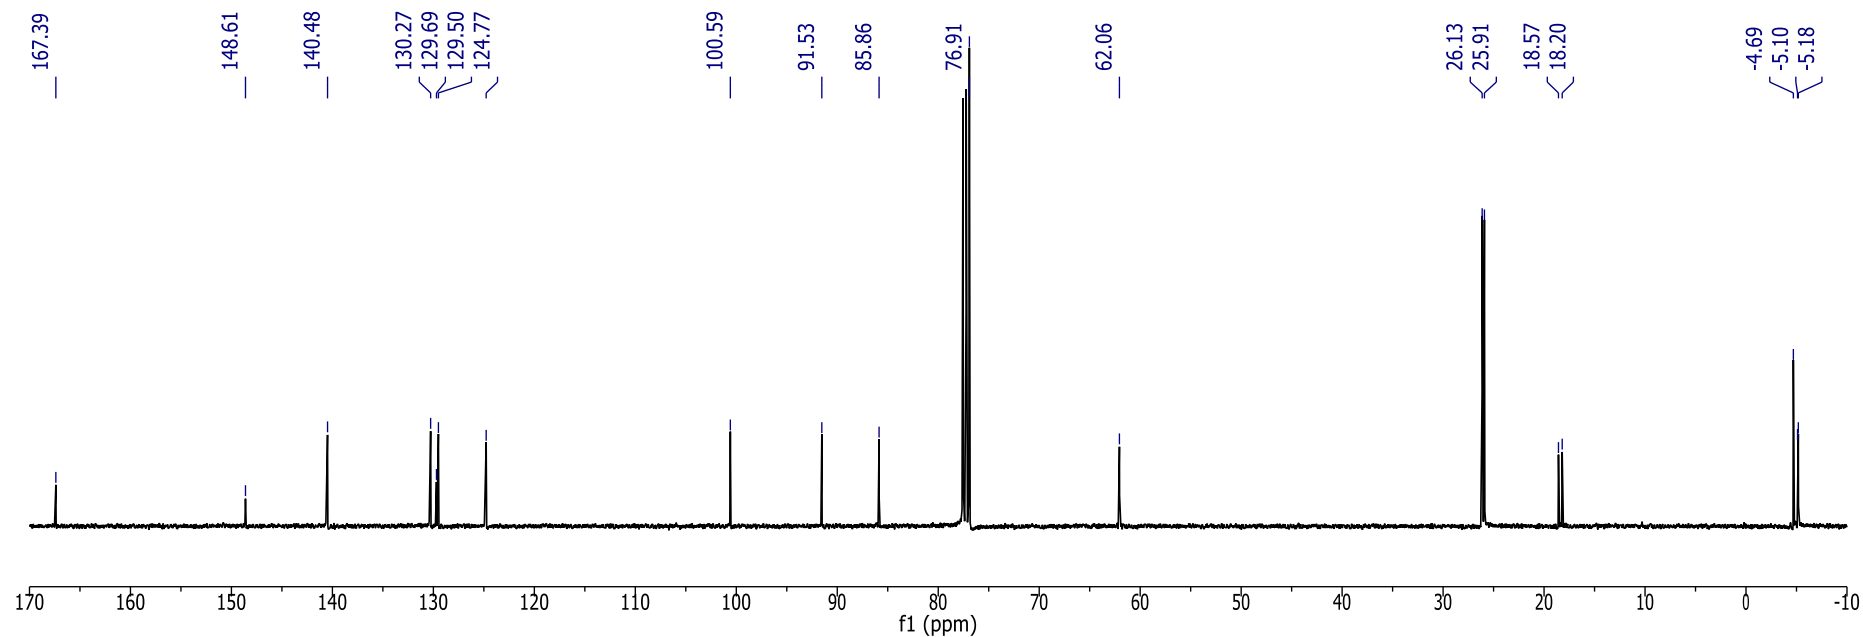



Figure S23. 2-[(3-Nitrophenyl)sulfanyl]-4,5-dihydro(3',5'-di-*O*-*tert*-1',2'-dideoxy- $\beta$ -*D*-arabinofuranoso)-[1,2-*d*]-oxazole (16).  $^1\text{H}$  NMR (400 MHz,  $\text{CDCl}_3$ ) and  $^{13}\text{C}$  NMR (100 MHz,  $\text{CDCl}_3$ ) spectrums.

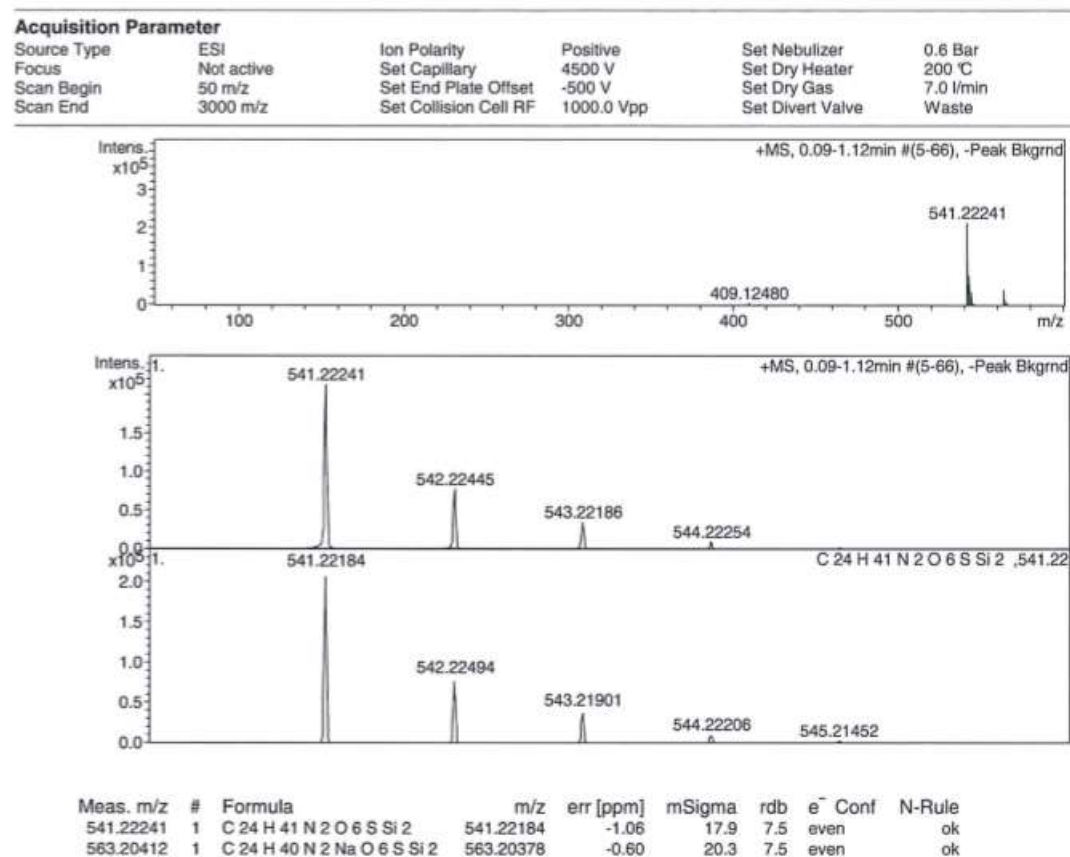

Figure S24. 2-[(3-Nitrophenyl)sulfanyl]-4,5-dihydro(3',5'-di-*O*-*tert*-1',2'-dideoxy- $\beta$ -*D*-arabinofuranoso)-[1,2-*d*]-oxazole (16). HRMS (ESI).



Figure S25. 2-[(2-Nitrophenyl)sulfanyl]-4,5-dihydro(3',5'-di-*O*-*tert*-1',2'-dideoxy- $\beta$ -D-arabinofuranoso)-[1,2-*d*]-oxazole (17).  $^1\text{H}$  NMR (400 MHz,  $\text{CDCl}_3$ ) and  $^{13}\text{C}$  NMR (100 MHz,  $\text{CDCl}_3$ ) spectrums.

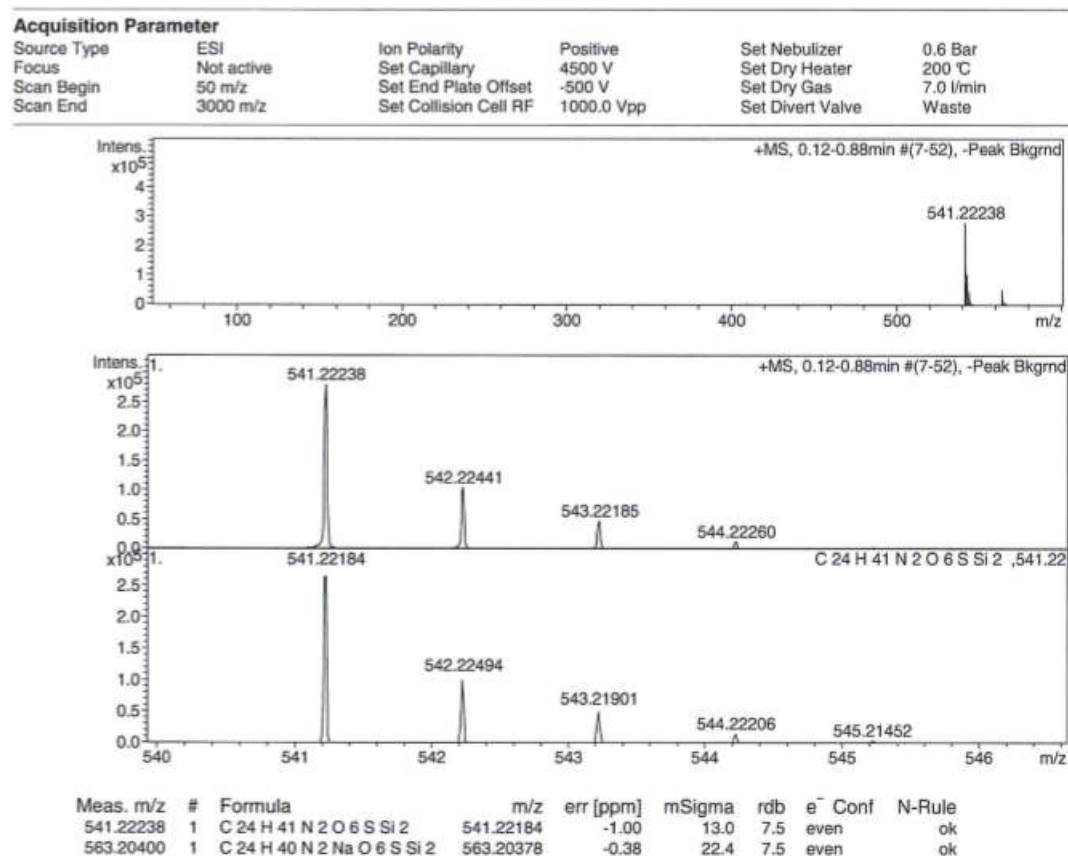

Figure S26. 2-[(2-Nitrophenyl)sulfanyl]-4,5-dihydro(3',5'-di-*O*-*tert*-1',2'-dideoxy- $\beta$ -D-arabinofuranoso)-[1,2-*d*]-oxazole (17). HRMS (ESI).

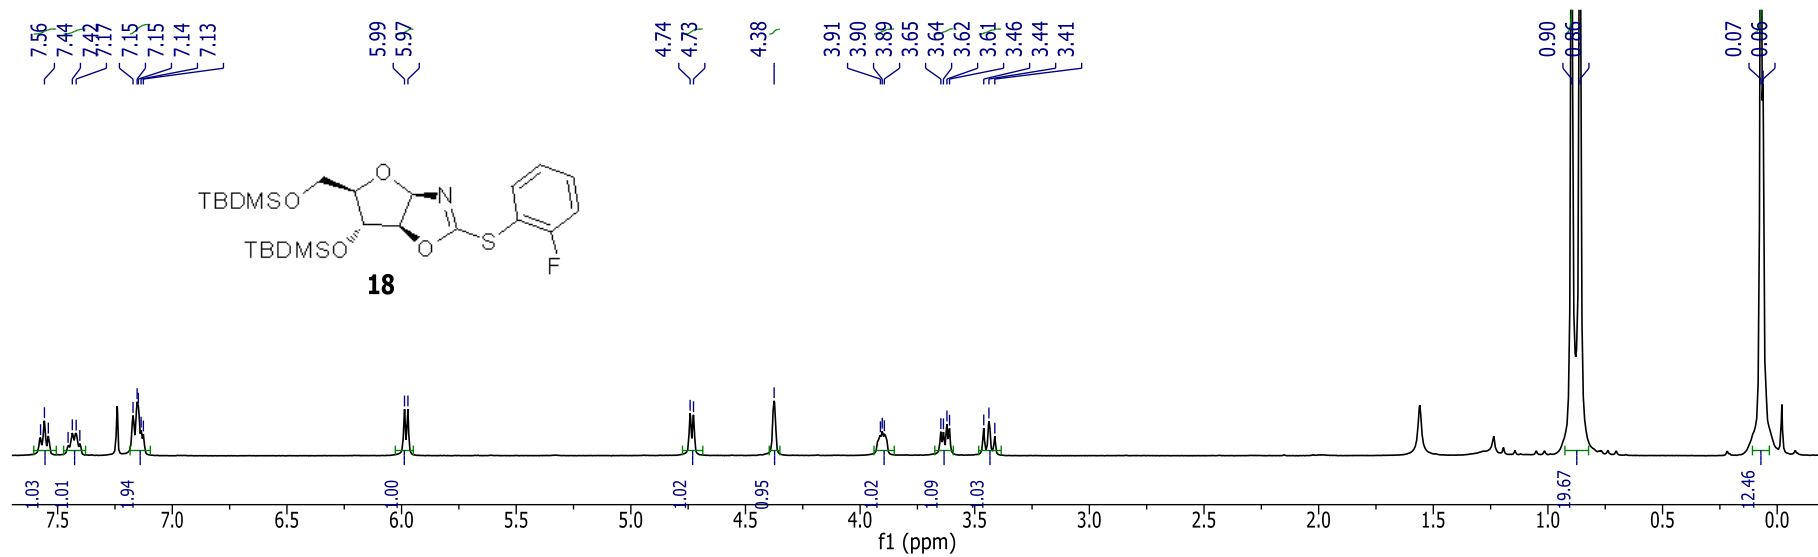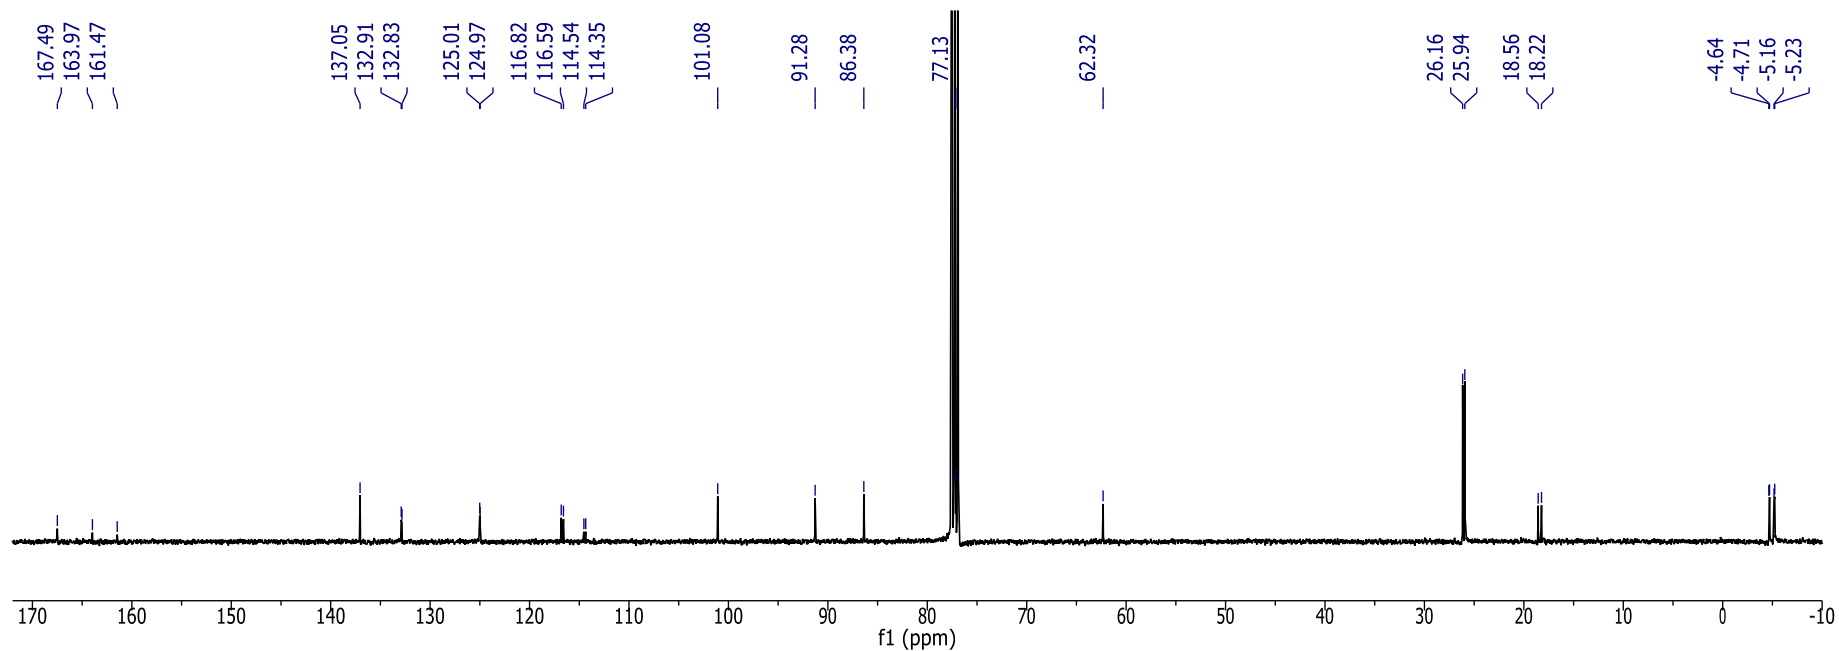

Figure S27. 2-[(2-Fluorophenyl)sulfanyl]-4,5-dihydro(3',5'-di-*O*-*tert*-1',2'-dideoxy- $\beta$ -*D*-arabinofuranoso)-[1,2-*d*]-oxazole (18).  $^1\text{H}$  NMR (400 MHz,  $\text{CDCl}_3$ ) and  $^{13}\text{C}$  NMR (100 MHz,  $\text{CDCl}_3$ ) spectrums.

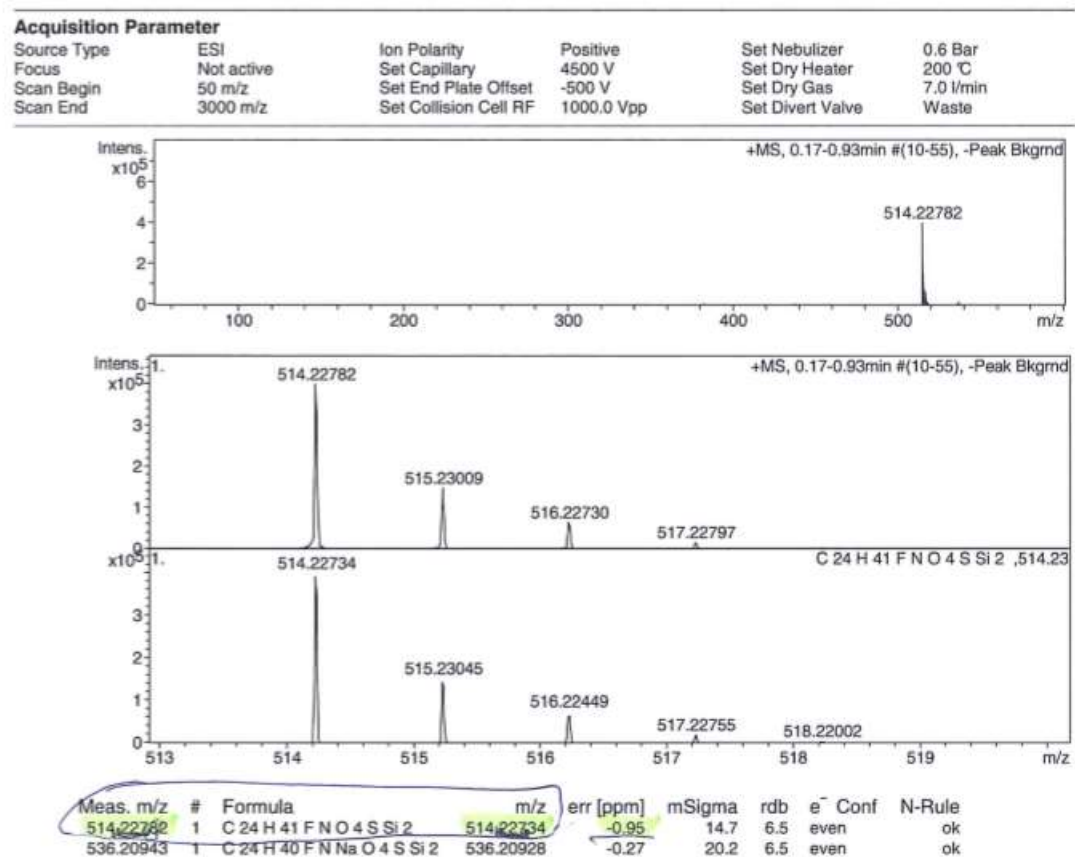

Figure S28. 2-[(2-Fluorophenyl)sulfanyl]-4,5-dihydro(3',5'-di-*O*-*tert*-1',2'-dideoxy- $\beta$ -*D*-arabinofuranoso)-[1,2-*d*]-oxazole (18). HRMS (ESI).

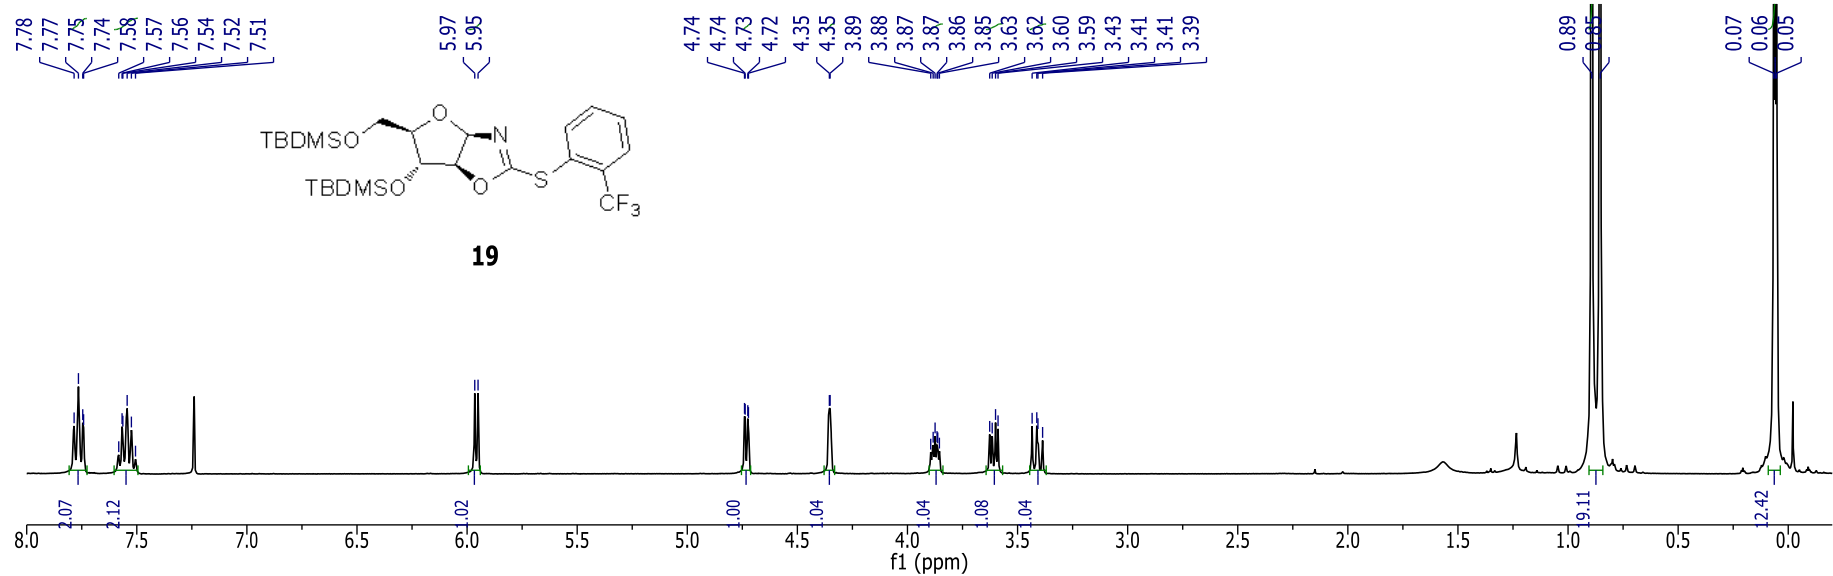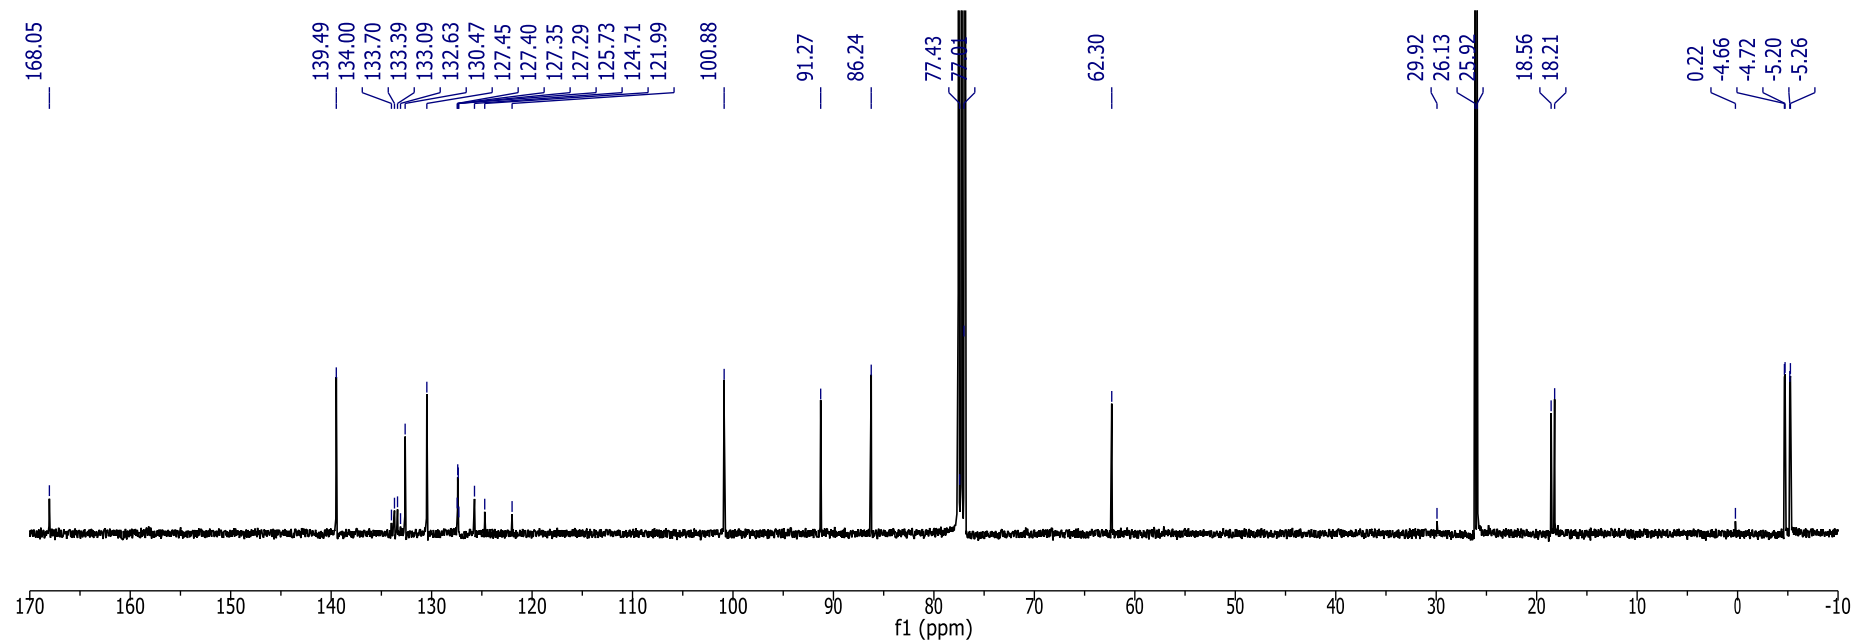

**Figure S29.** 2-[(2-Trifluoromethylphenyl)sulfanyl]-4,5-dihydro(3',5'-di-*O*-*tert*-1',2'-dideoxy- $\beta$ -*D*-arabinofuranoso)-[1,2-*d*]-oxazole (19).  $^1\text{H}$  NMR (400 MHz,  $\text{CDCl}_3$ ) and  $^{13}\text{C}$  NMR (100 MHz,  $\text{CDCl}_3$ ) spectrums.

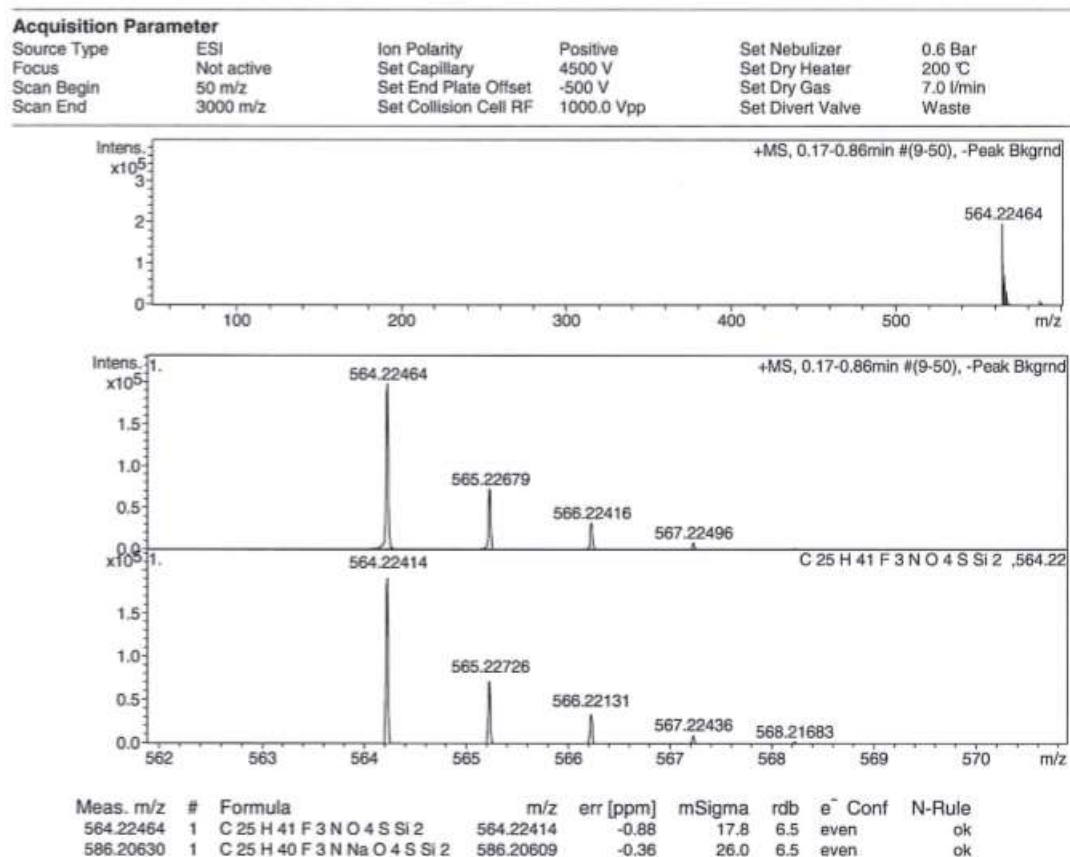

**Figure S30.** 2-[(2-Trifluoromethylphenyl)sulfanyl]-4,5-dihydro(3',5'-di-*O*-*tert*-1',2'-dideoxy- $\beta$ -*D*-arabinofuranoso)-[1,2-*d*]-oxazole (19). HRMS (ESI).

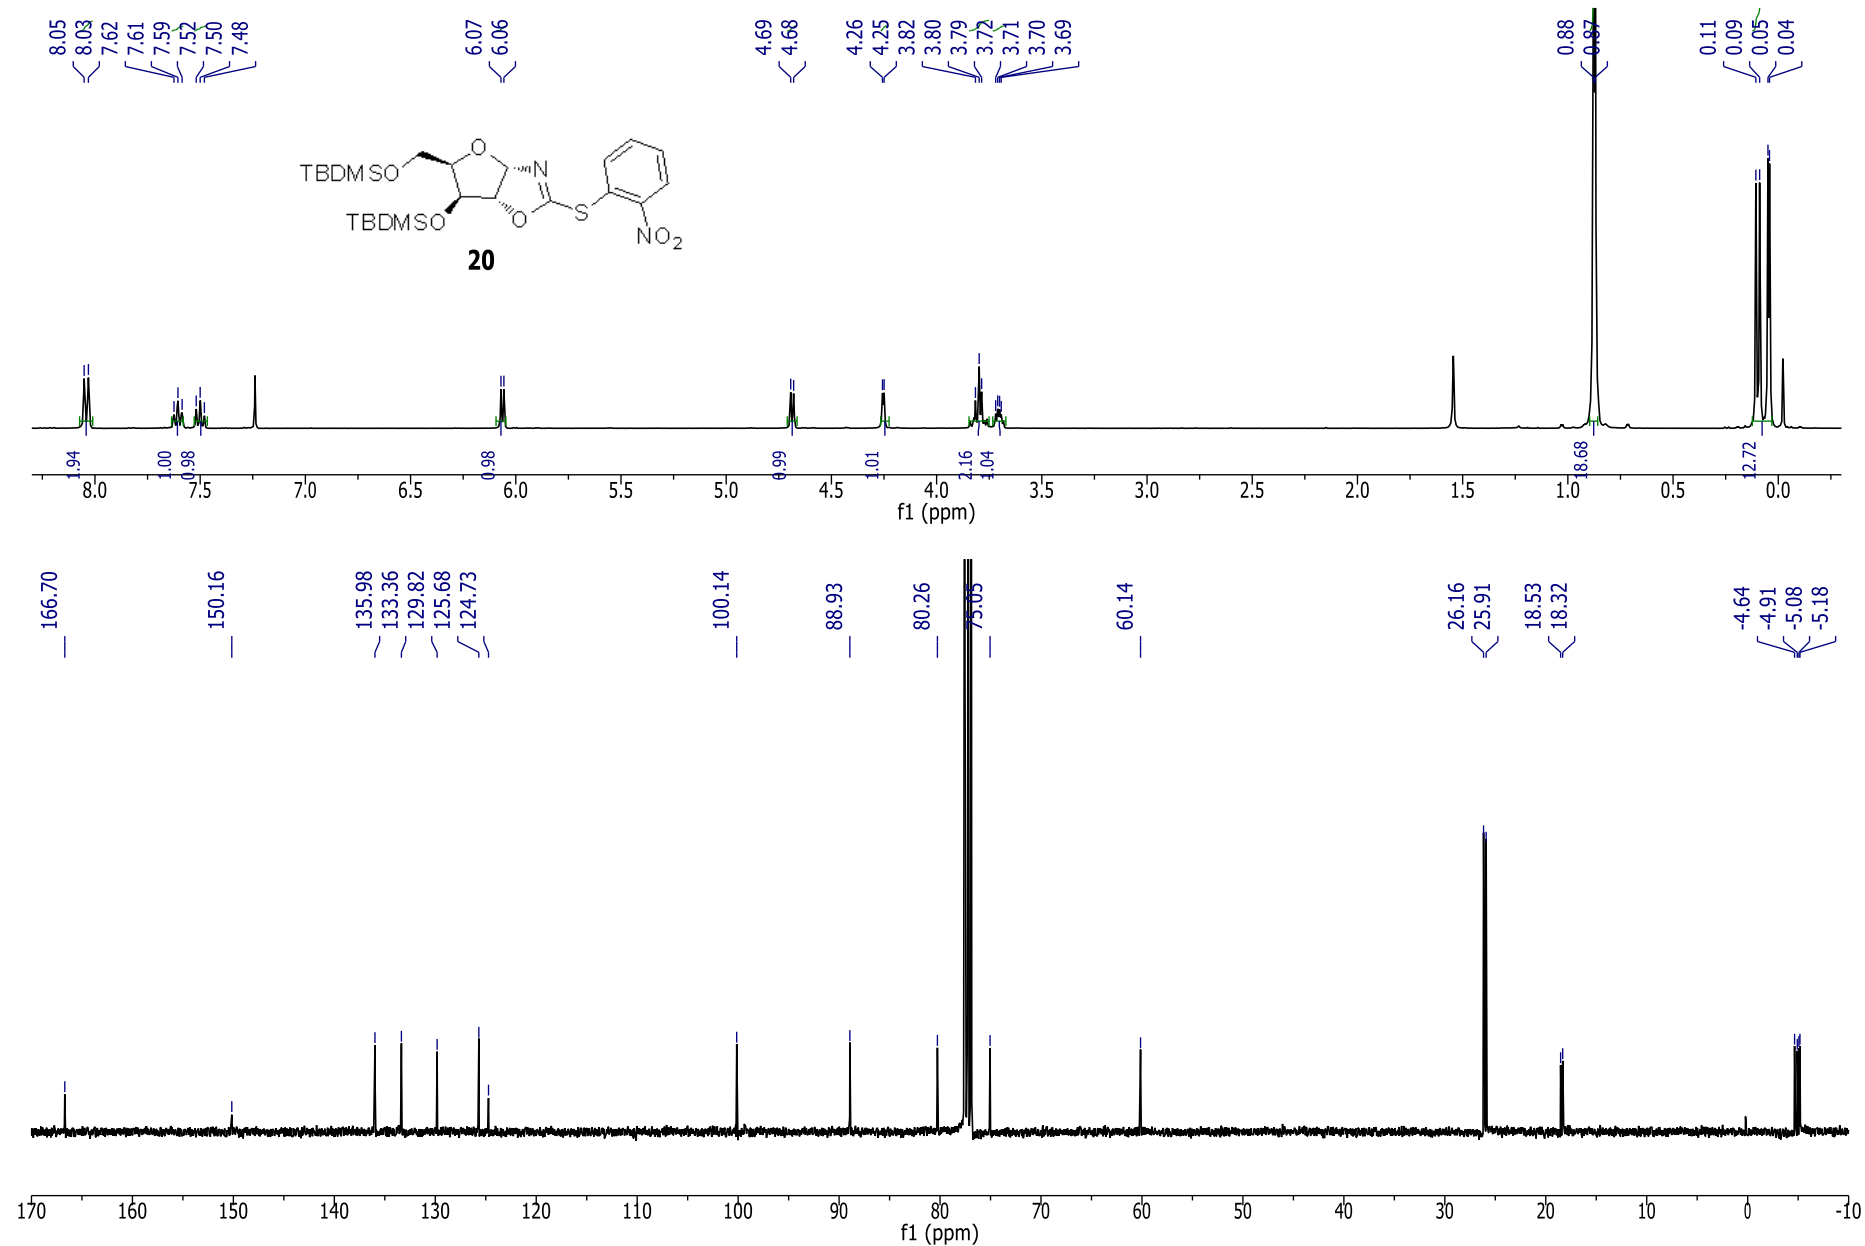



Figure S31. 2-[(2-Nitrophenyl)sulfanyl]-4,5-dihydro(3',5'-di-*O*-*tert*-1',2'-dideoxy- $\beta$ -*D*- xylofuranoso)-[1,2-*d*]-oxazole (20). <sup>1</sup>H NMR (400 MHz, CDCl<sub>3</sub>) and <sup>13</sup>C NMR (100 MHz, CDCl<sub>3</sub>) spectrums.

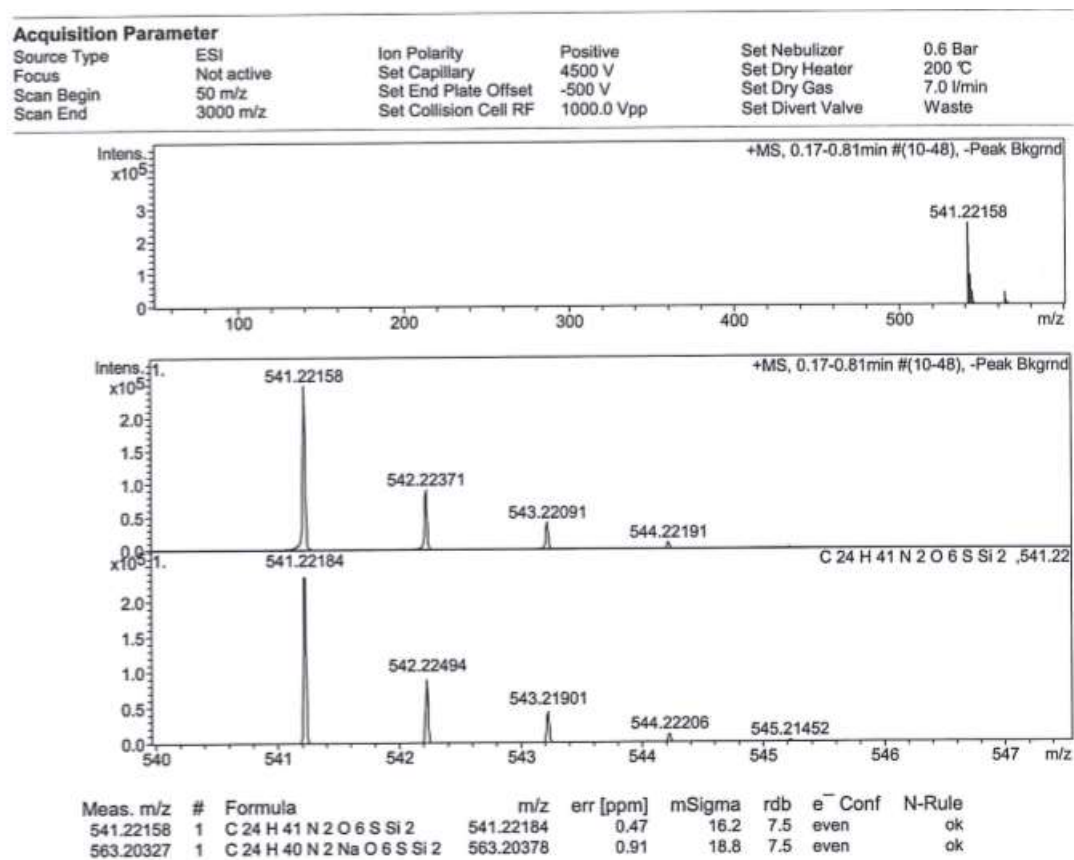

Figure S32. 2-[(2-Nitrophenyl)sulfanyl]-4,5-dihydro(3',5'-di-*O*-*tert*-1',2'-dideoxy- $\beta$ -*D*- xylofuranoso)-[1,2-*d*]-oxazole (20). HRMS (ESI).

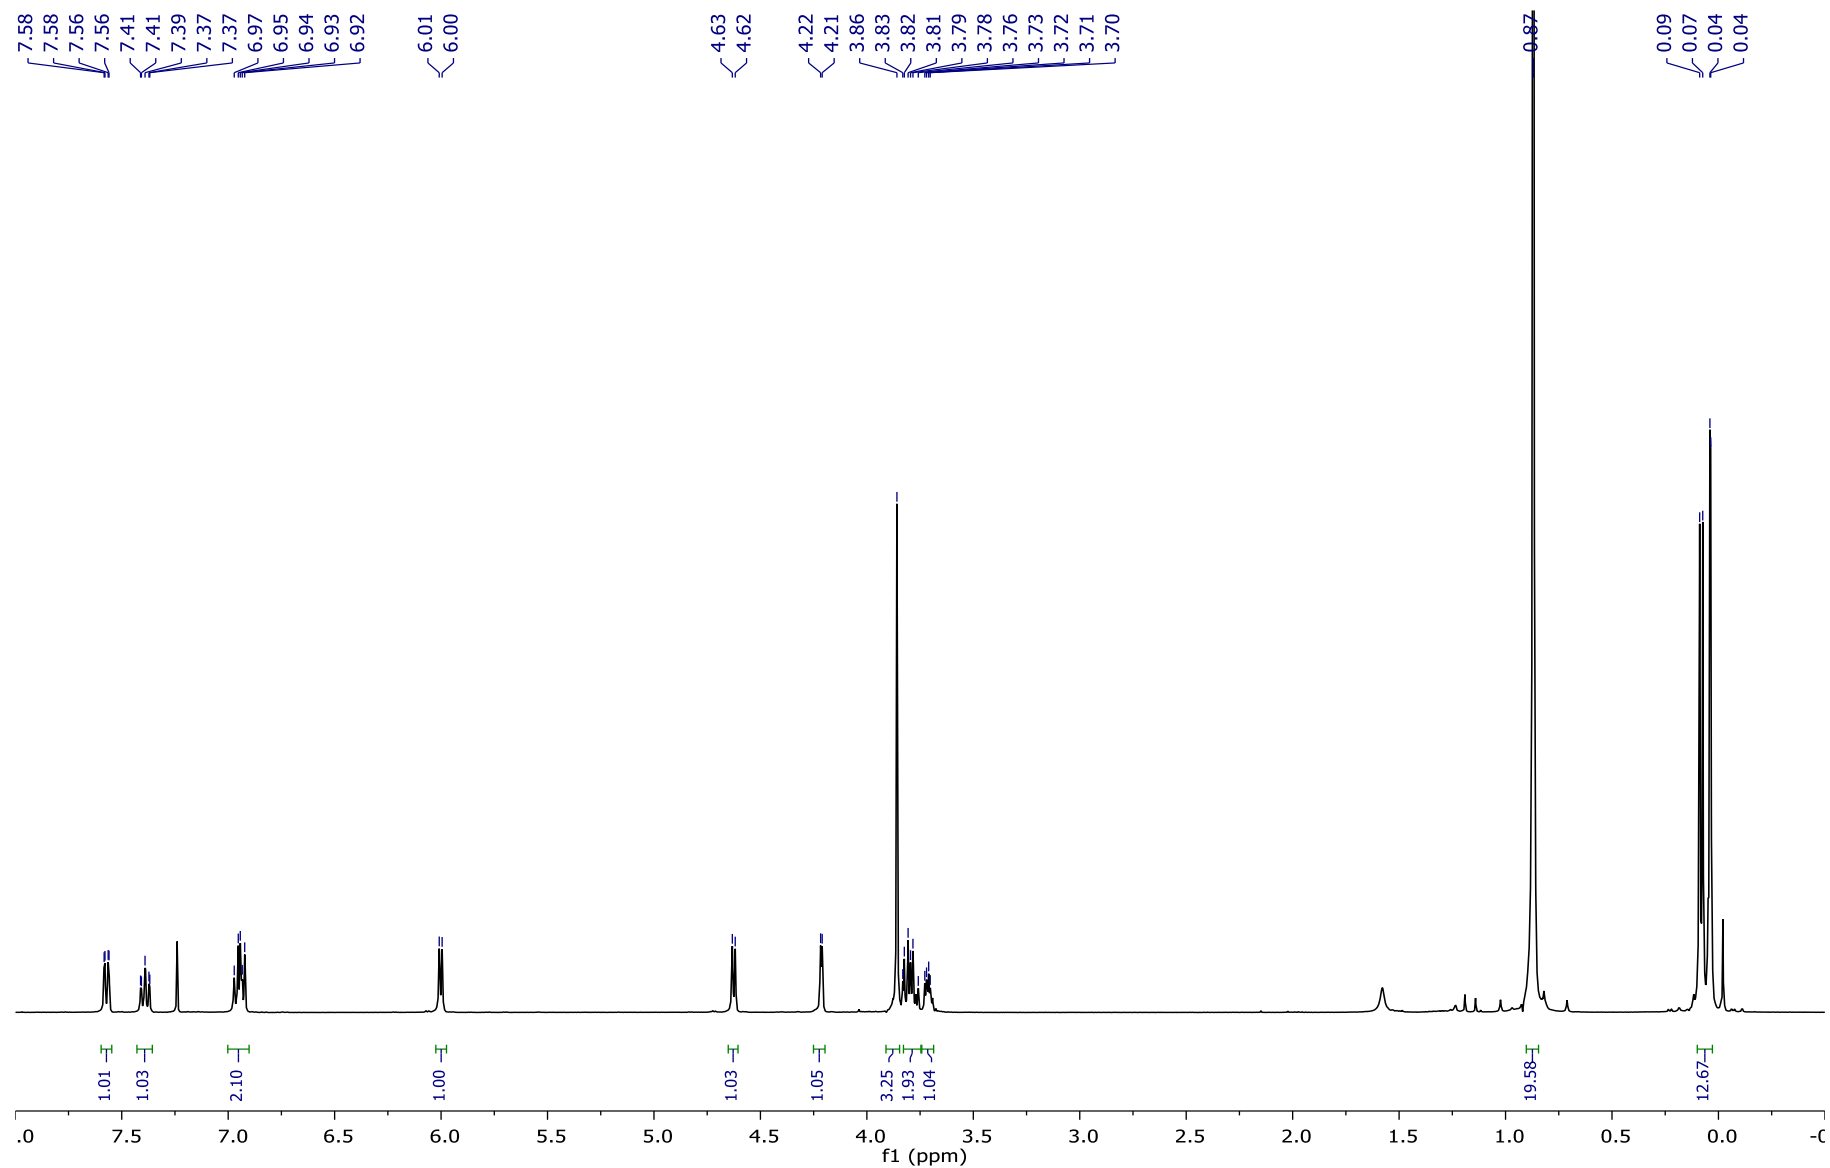

**Figure S33.** 2-[(2-Methoxyphenyl)sulfanyl]-4,5-dihydro(3',5'-di-*O*-*tert*-1',2'-dideoxy- $\beta$ -D- xylofuranoso)-[1,2-*d*]-oxazole (21).  $^1\text{H}$  NMR (400 MHz,  $\text{CDCl}_3$ ) spectrum.

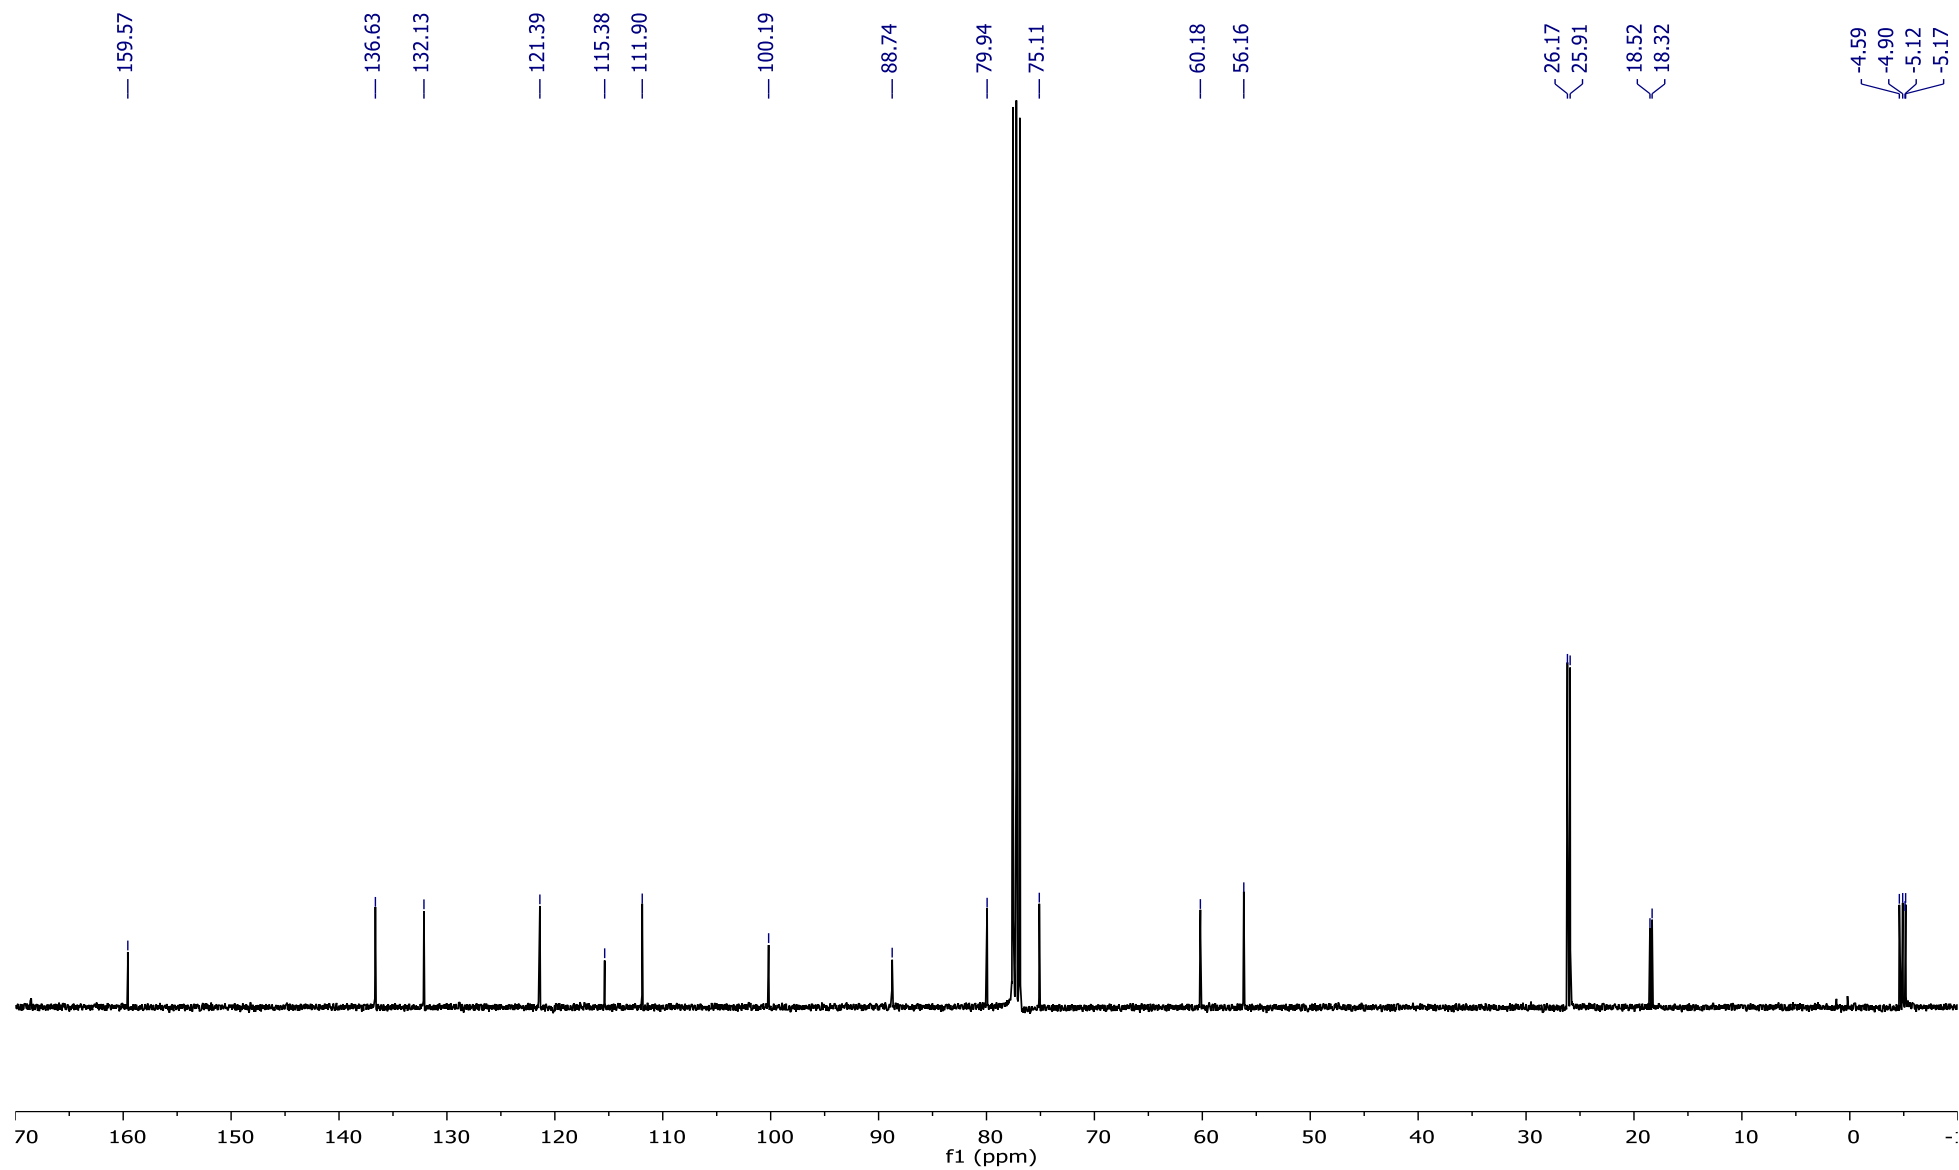

**Figure S34.** 2-[(2-Methoxyphenyl)sulfanyl]-4,5-dihydro(3',5'-di-*O*-*tert*-1',2'-dideoxy- $\beta$ -*D*-xylofuranoso)-[1,2-*d*]-oxazole (21). <sup>13</sup>C NMR (100 MHz, CDCl<sub>3</sub>) spectrum.

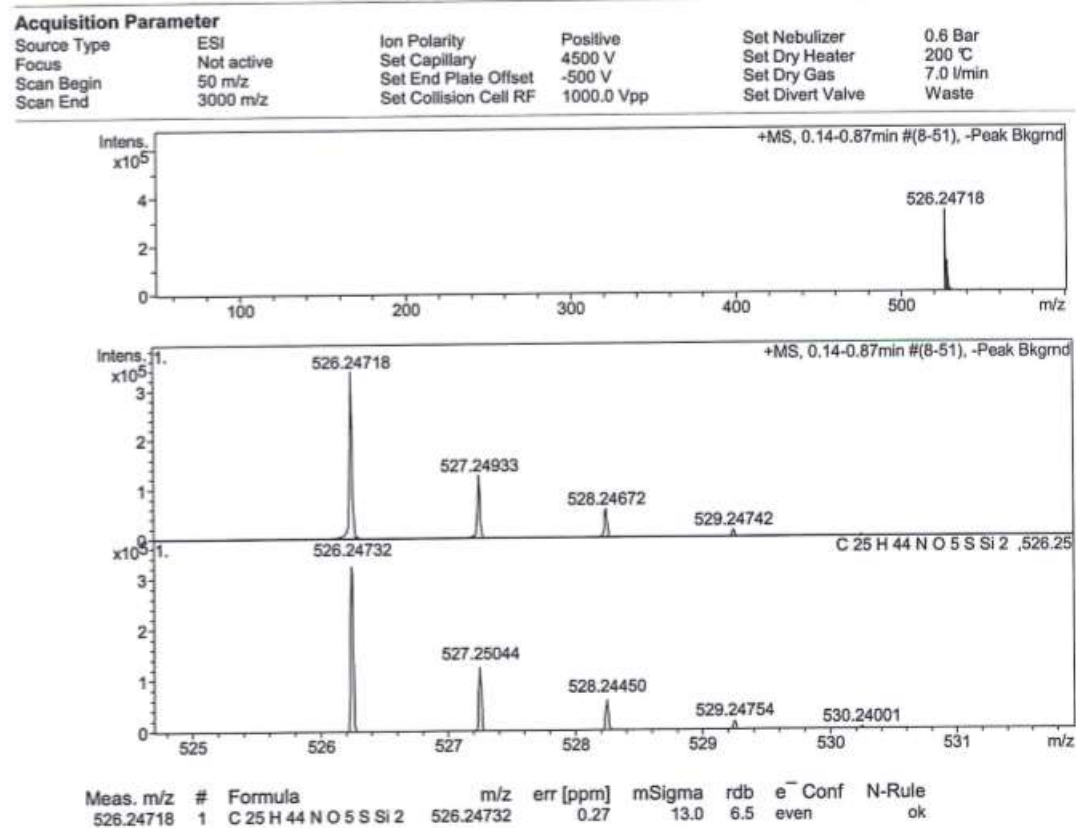

Figure S35. 2-[(2-Methoxyphenyl)sulfanyl]-4,5-dihydro(3',5'-di-*O*-*tert*-1',2'-dideoxy- $\beta$ -*D*- xylofuranoso)-[1,2-*d*]-oxazole (21). HRMS (ESI).

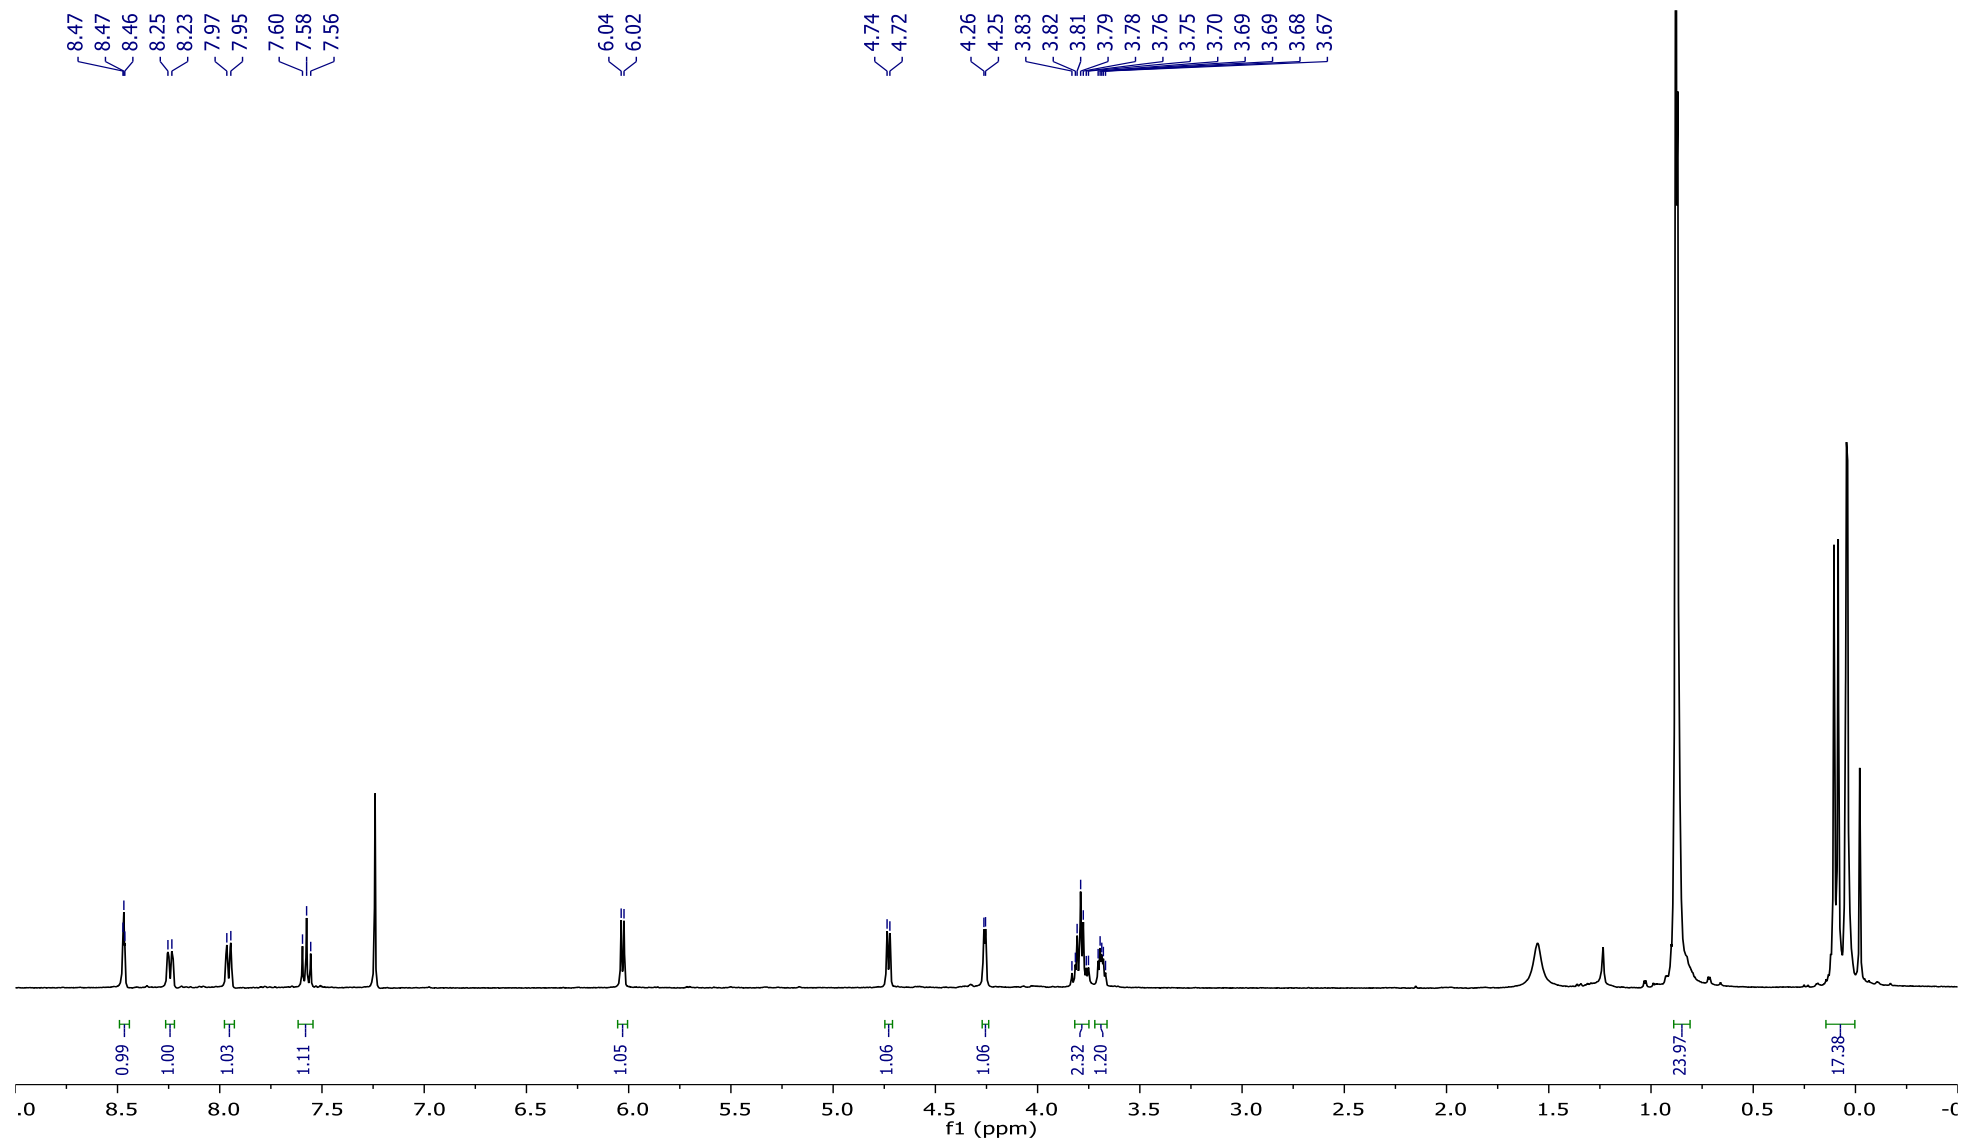

**Figure S36.** 2-[(2-Nitrophenyl)sulfanyl]-4,5-dihydro(3',5'-di-*O*-*tert*-1',2'-dideoxy- $\beta$ -*D*-ribofuranoso)-[1,2-*d*]-oxazole (22).  $^1\text{H}$  NMR (400 MHz,  $\text{CDCl}_3$ ) spectrum.

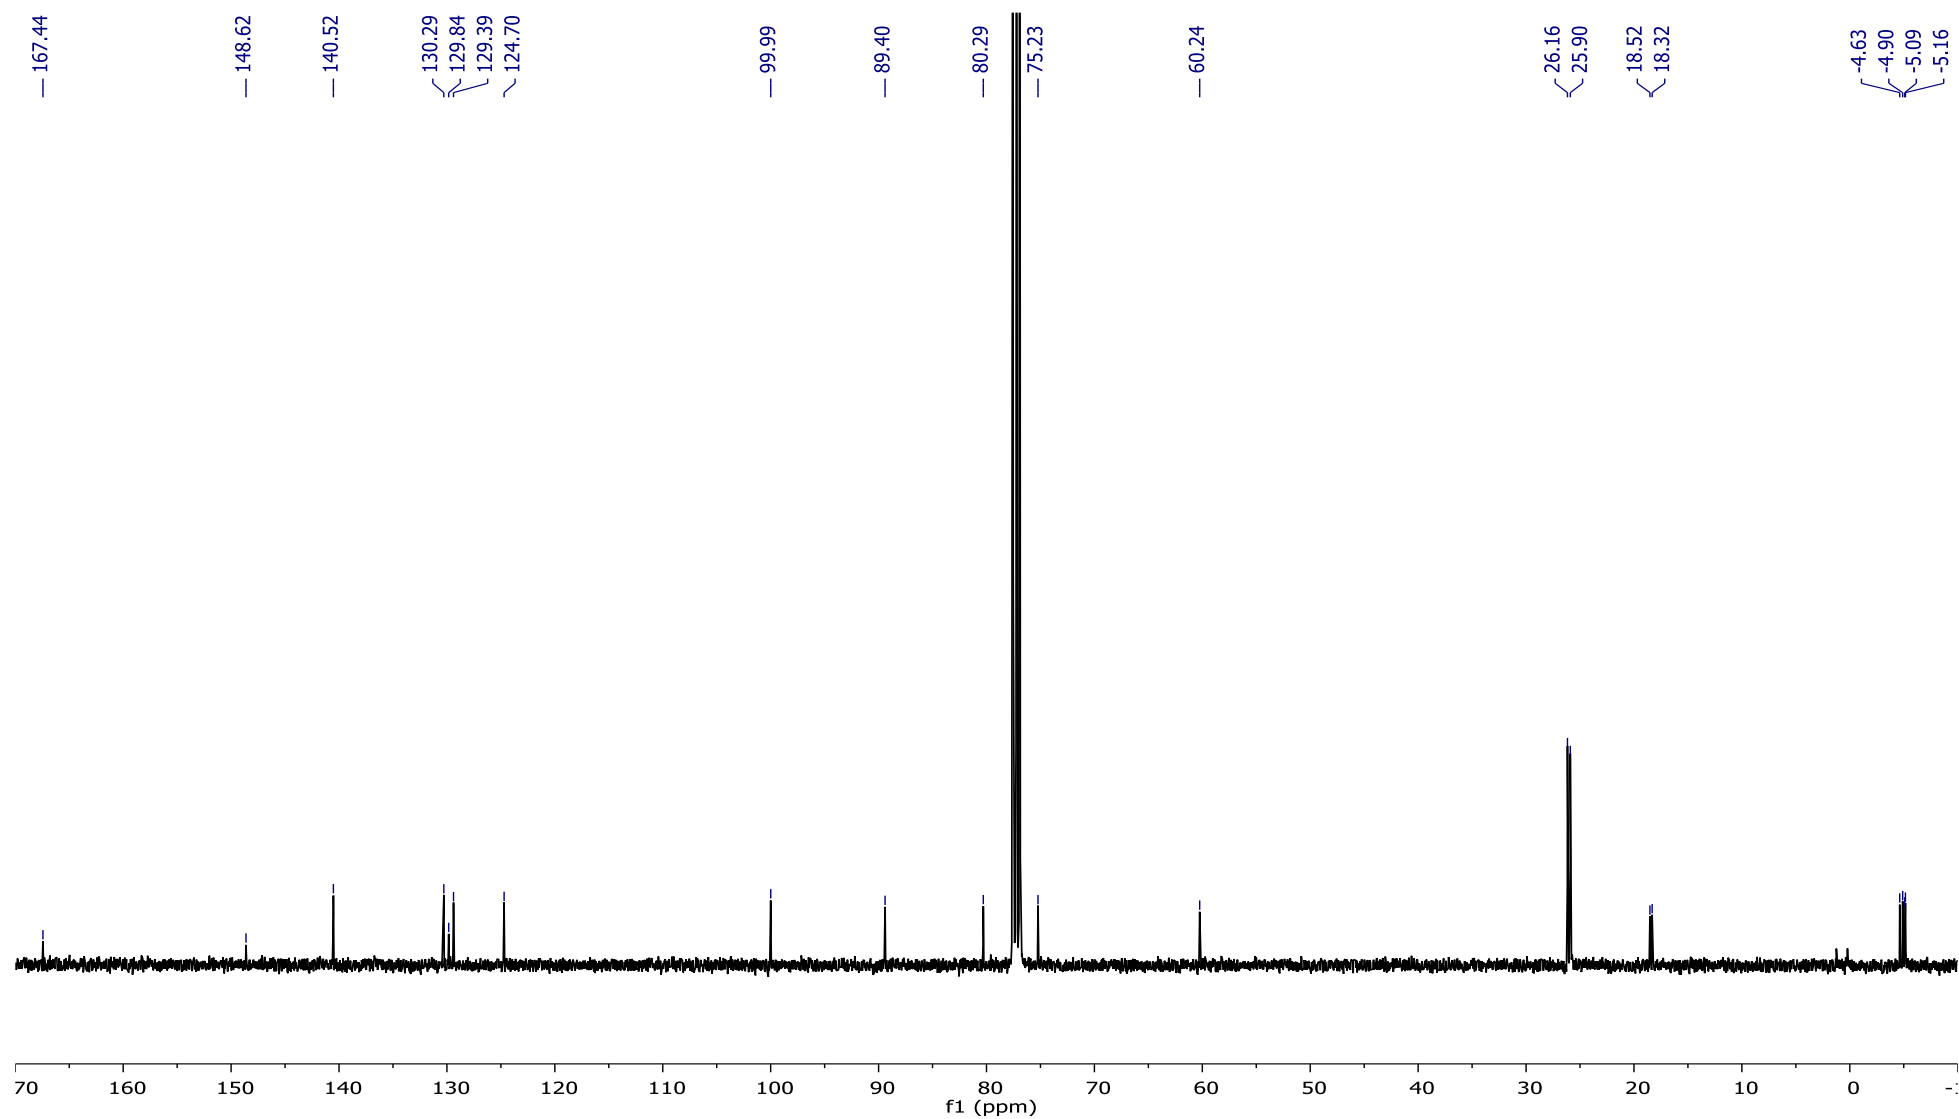

Figure S37. 2-[(2-Nitrophenyl)sulfanyl]-4,5-dihydro(3',5'-di-*O*-*tert*-1',2'-dideoxy- $\beta$ -*D*-ribofuranoso)-[1,2-*d*]-oxazole (22).  $^{13}\text{C}$  NMR (100 MHz,  $\text{CDCl}_3$ ) spectrum.

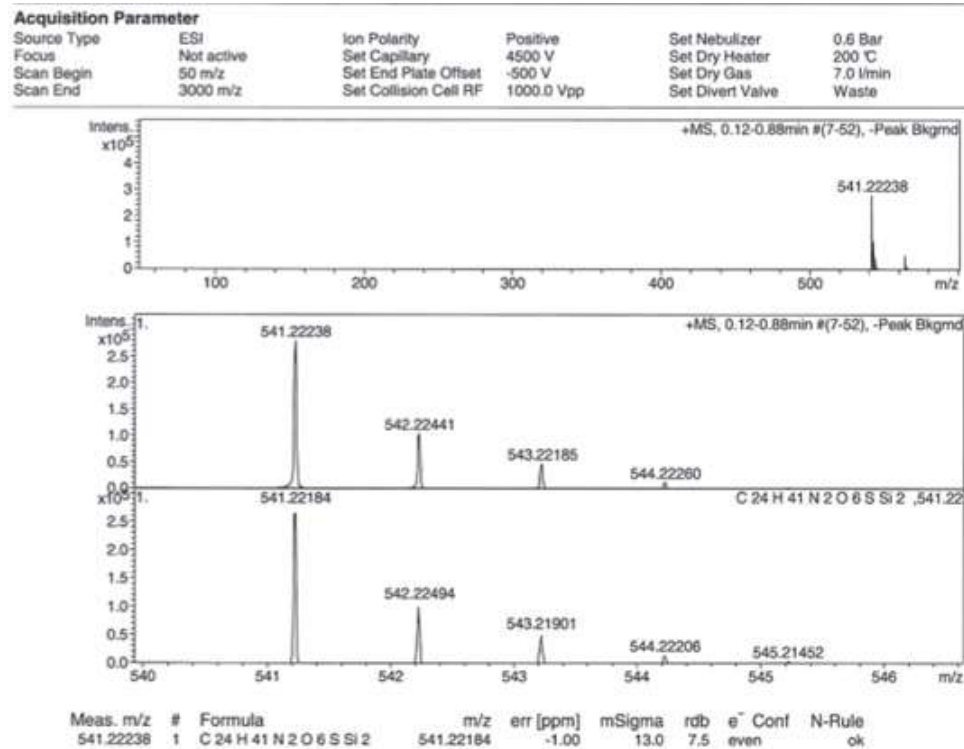

**Figure S38.** 2-[(2-Nitrophenyl)sulfanyl]-4,5-dihydro(3',5'-di-*O-tert*-1',2'-dideoxy- $\beta$ -*D*-ribofuranoso)-[1,2-*d*]-oxazole (22). HRMS (ESI).
